# Supplementary material for: Overexpression of the cohesin-core subunit SMC1A contributes to colorectal cancer development
Source: PubMed Central journal article supplement (PMC6397456; doi:10.1186/s13046-019-1116-0), 2019-03-01
Supplement: 13046_2019_1116_MOESM1_ESM.pdf [file 13046_2019_1116_MOESM1_ESM.pdf]

Supplementary Table 1. Features of CRC patients analyzed by OncoScan.

| Subject | Gender | Age (years) | Stage     | TNM |
|---------|--------|-------------|-----------|-----|
| 1       |        |             | Carcinoma | IV  |
|         | M      | 66          | Adenoma   |     |
|         |        |             | Mucosa    |     |
| 2       |        |             | Carcinoma | III |
|         | M      | 83          | Adenoma   |     |
|         |        |             | Mucosa    |     |
| 3       |        |             | Carcinoma | III |
|         | F      | 88          | Adenoma   |     |
|         |        |             | Mucosa    |     |
| 4       |        |             | Carcinoma | II  |
|         | M      | 80          | Adenoma   |     |
|         |        |             | Mucosa    |     |
| 5       |        |             | Carcinoma | III |
|         | M      | 70          | Adenoma   |     |
|         |        |             | Mucosa    |     |
| 6       |        |             | Carcinoma | II  |
|         | F      | 60          | Adenoma   |     |
|         |        |             | Mucosa    |     |
| 7       |        |             | Carcinoma | I   |
|         | F      | 81          | Adenoma   |     |
|         |        |             | Mucosa    |     |
| 8       |        |             | Carcinoma | III |
|         | M      | 76          | Adenoma   |     |
|         |        |             | Mucosa    |     |
| 9       |        |             | Carcinoma | III |
|         | M      | 63          | Adenoma   |     |
|         |        |             | normale   |     |
| 10      |        |             | Carcinoma | III |
|         | F      | 80          | Adenoma   |     |
|         |        |             | Mucosa    |     |
| 11      |        |             | Carcinoma | III |
|         | M      | 83          | Adenoma   |     |
|         |        |             | Mucosa    |     |
| 12      |        |             | Carcinoma | III |
|         | M      | 84          | Adenoma   |     |
|         |        |             | Mucosa    |     |
| 13      |        |             | Carcinoma | II  |
|         | M      | 69          | Adenoma   |     |
|         |        |             | Mucosa    |     |
| 14      |        |             | Carcinoma | III |

|           |   |    |           |     |
|-----------|---|----|-----------|-----|
|           | M | 51 | Adenoma   |     |
|           |   |    | Mucosa    |     |
| <b>15</b> |   |    | Carcinoma | III |
|           | M | 78 | Adenoma   |     |
|           |   |    | Mucosa    |     |
| <b>16</b> |   |    | Carcinoma | II  |
|           | M | 79 | Adenoma   |     |
|           |   |    | Mucosa    |     |

Supplementary Table 2. Features of CRC patients analyzed by immunohistochemistry.

| <b>Subject</b> | <b>Gender</b> | <b>Age (years)</b> | <b>Stage</b> | <b>TNM</b> |
|----------------|---------------|--------------------|--------------|------------|
| <b>1*</b>      |               |                    | Carcinoma    | IV         |
|                | M             | 66                 | Adenoma      |            |
|                |               |                    | Mucosa       |            |
| <b>2*</b>      |               |                    | Carcinoma    | III        |
|                | M             | 83                 | Adenoma      |            |
|                |               |                    | Mucosa       |            |
| <b>3*</b>      |               |                    | Carcinoma    | III        |
|                | F             | 88                 | Adenoma      |            |
|                |               |                    | Mucosa       |            |
| <b>4*</b>      |               |                    | Carcinoma    | II         |
|                | M             | 80                 | Adenoma      |            |
|                |               |                    | Mucosa       |            |
| <b>5</b>       |               |                    | Carcinoma    | III        |
|                | F             | 81                 | Adenoma      |            |
|                |               |                    | Mucosa       |            |
| <b>6</b>       |               |                    | Carcinoma    | III        |
|                | M             | 65                 | Adenoma      |            |
|                |               |                    | Mucosa       |            |
| <b>7*</b>      |               |                    | Carcinoma    | III        |
|                | M             | 70                 | Adenoma      |            |
|                |               |                    | Mucosa       |            |
| <b>8*</b>      |               |                    | Carcinoma    | II         |
|                | F             | 60                 | Adenoma      |            |
|                |               |                    | Mucosa       |            |
| <b>9*</b>      |               |                    | Carcinoma    | I          |
|                | F             | 81                 | Adenoma      |            |
|                |               |                    | Mucosa       |            |
| <b>10*</b>     |               |                    | Carcinoma    | III        |
|                | M             | 76                 | Adenoma      |            |
|                |               |                    | Mucosa       |            |
| <b>11*</b>     |               |                    | Carcinoma    | III        |
|                | M             | 63                 | Adenoma      |            |
|                |               |                    | normale      |            |
| <b>12*</b>     |               |                    | Carcinoma    | III        |
|                | F             | 80                 | Adenoma      |            |
|                |               |                    | Mucosa       |            |
| <b>13</b>      |               |                    | Carcinoma    | II         |
|                | M             | 71                 | Adenoma      |            |
|                |               |                    | Mucosa       |            |
| <b>14*</b>     |               |                    | Carcinoma    | III        |

|            |   |    |           |     |
|------------|---|----|-----------|-----|
|            | M | 83 | Adenoma   |     |
|            |   |    | Mucosa    |     |
| <b>15</b>  |   |    | Carcinoma | III |
|            | F | 55 | Adenoma   |     |
|            |   |    | Mucosa    |     |
| <b>16</b>  |   |    | Carcinoma | IV  |
|            | M | 73 | Adenoma   |     |
|            |   |    | Mucosa    |     |
| <b>17</b>  |   |    | Carcinoma | III |
|            | M | 52 | Adenoma   |     |
|            |   |    | Mucosa    |     |
| <b>18</b>  |   |    | Carcinoma | II  |
|            | M | 74 | Adenoma   |     |
|            |   |    | Mucosa    |     |
| <b>19</b>  |   |    | Carcinoma | III |
|            | M | 84 | Adenoma   |     |
|            |   |    | Mucosa    |     |
| <b>20</b>  |   |    | Carcinoma | II  |
|            | M | 73 | Adenoma   |     |
|            |   |    | Mucosa    |     |
| <b>21*</b> |   |    | Carcinoma | III |
|            | M | 84 | Adenoma   |     |
|            |   |    | Mucosa    |     |
| <b>22*</b> |   |    | Carcinoma | II  |
|            | M | 69 | Adenoma   |     |
|            |   |    | Mucosa    |     |
| <b>23*</b> |   |    | Carcinoma | III |
|            | M | 51 | Adenoma   |     |
|            |   |    | Mucosa    |     |
| <b>24*</b> |   |    | Carcinoma | III |
|            | M | 78 | Adenoma   |     |
|            |   |    | Mucosa    |     |
| <b>25</b>  |   |    | Carcinoma | III |
|            | M | 69 | Adenoma   |     |
|            |   |    | Mucosa    |     |
| <b>26</b>  |   |    | Carcinoma | IV  |
|            | M | 75 | Adenoma   |     |
|            |   |    | Mucosa    |     |
| <b>27</b>  |   |    | Carcinoma | II  |
|            | M | 50 | Adenoma   |     |
|            |   |    | Mucosa    |     |
| <b>28</b>  |   |    | Carcinoma | III |
|            | M | 64 | Adenoma   |     |

|            |   |    |           |     |
|------------|---|----|-----------|-----|
|            |   |    | Mucosa    |     |
| <b>29</b>  |   |    | Carcinoma | III |
|            | F | 78 | Adenoma   |     |
|            |   |    | Mucosa    |     |
| <b>30</b>  |   |    | Carcinoma | III |
|            | F | 83 | Adenoma   |     |
|            |   |    | Mucosa    |     |
| <b>31</b>  |   |    | Carcinoma | II  |
|            | M | 85 | Adenoma   |     |
|            |   |    | Mucosa    |     |
| <b>32</b>  |   |    | Carcinoma | IV  |
|            | F | 84 | Adenoma   |     |
|            |   |    | Mucosa    |     |
| <b>33</b>  |   |    | Carcinoma | III |
|            | M | 89 | Adenoma   |     |
|            |   |    | Mucosa    |     |
| <b>34</b>  |   |    | Carcinoma | III |
|            | M | 63 | Adenoma   |     |
|            |   |    | Mucosa    |     |
| <b>35</b>  |   |    | Carcinoma | IV  |
|            | M | 81 | Adenoma   |     |
|            |   |    | Mucosa    |     |
| <b>36</b>  |   |    | Carcinoma | III |
|            | M | 51 | Adenoma   |     |
|            |   |    | Mucosa    |     |
| <b>37</b>  |   |    | Carcinoma | III |
|            | F | 50 | Adenoma   |     |
|            |   |    | Mucosa    |     |
| <b>38</b>  |   |    | Carcinoma | III |
|            | F | 70 | Adenoma   |     |
|            |   |    | Mucosa    |     |
| <b>39</b>  |   |    | Carcinoma | II  |
|            | F | 52 | Adenoma   |     |
|            |   |    | Mucosa    |     |
| <b>40</b>  |   |    | Carcinoma | III |
|            | M | 63 | Adenoma   |     |
|            |   |    | Mucosa    |     |
| <b>41</b>  |   |    | Carcinoma | III |
|            | F | 40 | Adenoma   |     |
|            |   |    | Mucosa    |     |
| <b>42*</b> |   |    | Carcinoma | II  |
|            | M | 79 | Adenoma   |     |
|            |   |    | Mucosa    |     |

|    |   |    |           |     |
|----|---|----|-----------|-----|
| 43 |   |    | Carcinoma | IV  |
|    | M | 49 | Adenoma   |     |
|    |   |    | Mucosa    |     |
| 44 |   |    | Carcinoma | II  |
|    | M | 63 | Adenoma   |     |
|    |   |    | Mucosa    |     |
| 45 |   |    | Carcinoma | III |
|    | M | 58 | Adenoma   |     |
|    |   |    | Mucosa    |     |
| 46 |   |    | Carcinoma | III |
|    | M | 42 | Adenoma   |     |
|    |   |    | Mucosa    |     |
| 47 |   |    | Carcinoma | III |
|    | F | 78 | Adenoma   |     |
|    |   |    | Mucosa    |     |
| 48 |   |    | Carcinoma | IV  |
|    | F | 70 | Adenoma   |     |
|    |   |    | Mucosa    |     |
| 49 |   |    | Carcinoma | III |
|    | M | 58 | Adenoma   |     |
|    |   |    | Mucosa    |     |
| 50 |   |    | Carcinoma | III |
|    | M | 72 | Adenoma   |     |
|    |   |    | Mucosa    |     |
| 51 |   |    | Carcinoma | III |
|    | M | 64 | Adenoma   |     |
|    |   |    | Mucosa    |     |
| 52 |   |    | Carcinoma | II  |
|    | M | 59 | Adenoma   |     |
|    |   |    | Mucosa    |     |
| 53 |   |    | Carcinoma | III |
|    | M | 76 | Adenoma   |     |
|    |   |    | Mucosa    |     |
| 54 |   |    | Carcinoma | IV  |
|    | M | 65 | Adenoma   |     |
|    |   |    | Mucosa    |     |
| 55 |   |    | Carcinoma | III |
|    | F | 83 | Adenoma   |     |
|    |   |    | Mucosa    |     |
| 56 |   |    | Carcinoma | III |
|    | M | 65 | Adenoma   |     |
|    |   |    | Mucosa    |     |
| 57 |   |    | Carcinoma | III |

|           |   |    |           |     |
|-----------|---|----|-----------|-----|
|           | M | 55 | Adenoma   |     |
|           |   |    | Mucosa    |     |
| <b>58</b> |   |    | Carcinoma | IV  |
|           | F | 72 | Adenoma   |     |
|           |   |    | Mucosa    |     |
| <b>59</b> |   |    | Carcinoma | III |
|           | M | 62 | Adenoma   |     |
|           |   |    | Mucosa    |     |
| <b>60</b> |   |    | Carcinoma | III |
|           | F | 51 | Adenoma   |     |
|           |   |    | Mucosa    |     |
| <b>61</b> |   |    | Carcinoma | III |
|           | M | 76 | Adenoma   |     |
|           |   |    | Mucosa    |     |
| <b>62</b> |   |    | Carcinoma | III |
|           | F | 73 | Adenoma   |     |
|           |   |    | Mucosa    |     |
| <b>63</b> |   |    | Carcinoma | III |
|           | M | 73 | Adenoma   |     |
|           |   |    | Mucosa    |     |
| <b>64</b> |   |    | Carcinoma | III |
|           | M | 55 | Adenoma   |     |
|           |   |    | Mucosa    |     |
| <b>65</b> |   |    | Carcinoma | III |
|           | M | 67 | Adenoma   |     |
|           |   |    | Mucosa    |     |
| <b>66</b> |   |    | Carcinoma | III |
|           | M | 75 | Adenoma   |     |
|           |   |    | Mucosa    |     |

\*Also analyzed by OncoScan
