# Supplementary material for: Overexpression of the cohesin-core subunit SMC1A contributes to colorectal cancer development
Source: PubMed Central journal article supplement (PMC6397456; doi:10.1186/s13046-019-1116-0), 2019-03-01
Supplement: 13046_2019_1116_MOESM2_ESM.pdf [file 13046_2019_1116_MOESM2_ESM.pdf]

Supplementary Table 3. Nucleotide primers used for amplifying the *SMC1A* gene (NCBI Reference Sequence: NG\_006988.2)

| Primer | Forward primer       | Reverse primer         | Size(bp) | Exon   |
|--------|----------------------|------------------------|----------|--------|
| 1      | CGTATACGCAACATCAGTCC | CGCGACGTTTCAGGTTACAT   | 379      | 1      |
| 2      | GAGTACTGAGTGATTAGGGG | TGAGATGGAGCAGACAGAGT   | 597      | 2/3    |
| 2A     | GAGTACTGAGTGATTAGGGG | CTCCTTCCTGTCCCAATCAA   | 371      | 2      |
| 2B     | GTACCTTTGCCCGTGTCAAT | TGAGATGGAGCAGACAGAGT   | 324      | 3      |
| 3      | AATGGGTAAGGTGAACTGGG | AAACAGCACGGCCTCTTGGT   | 653      | 4/ 5   |
| 4      | CTCCTTTGGGTGAAAAGCCT | GGATTTGGGATGCTCAACCT   | 642      | 6/ 7   |
| 5      | ATGGTCTTGGCGTAAAGCCT | GATTGGCAACCCTGTCCTTA   | 586      | 8/ 9   |
| 5A     | ATGGTCTTGGCGTAAAGCCT | TTCATCAATACGCCGCTTGG   | 366      | 8      |
| 5B     | ACCTACATGCCCTCTTCAT  | GATTGGCAACCCTGTCCTTA   | 397      | 9      |
| 6      | ATTAGGATTCTGAGCCAGC  | AATCTCCAGTACTGAGCCTG   | 580      | 10/ 11 |
| 6A     | ATTAGGATTCTGAGCCAGC  | TCAGTCAGTGGCAGAACACA   | 334      | 10     |
| 6B     | TGTGTTCTGCCACTGACTGA | AATCTCCAGTACTGAGCCTG   | 265      | 11     |
| 7      | CAGGCTCAGTACTGGAGATT | AACCTAGGCCAGGAATGTGT   | 508      | 12/ 13 |
| 8      | CCAATGCAGTCAAGGTAGCT | GATGTCAAGCTAGAGGCTCA   | 456      | 14/ 15 |
| 9      | CCTGGGTCTAGTTTCCCTTT | GACATTATCCTTCTGTCTGTCG | 324      | 16     |
| 10     | AACTGCCTAGTAGGAAGGGT | CCTTCCTGGTCACTTTCACT   | 562      | 17/ 18 |
| 10A    | AACTGCCTAGTAGGAAGGGT | CACCTCCTTCTGTAAATGGG   | 358      | 17     |
| 10B    | ATTCGTAAGAACTCGGGGG  | CCTTCCTGGTCACTTTCACT   | 351      | 18     |
| 11     | GTCTGCTCCACTTGACTCTC | CCTCTCTGGACAAGTAGGAA   | 222      | 19     |
| 12     | CCACACTCAGTCAGTCATCT | TGGCATAACCTTAGCCTCTT   | 298      | 20     |
| 13     | TGTTCTGCTCTGGATTGTC  | TCACCTTCGCAGATCTCTGT   | 600      | 21/22  |
| 13A    | TGTTCTGCTCTGGATTGTC  | CTGAGACTGGATGGAGATAG   | 321      | 21     |
| 13B    | CTATCTCCATCCAGTCTCAG | TCACCTTCGCAGATCTCTGT   | 298      | 22     |
| 14     | TCAGGCAACTTTGAGACCTG | TGGCCATTTCAGGACCTGATT  | 737      | 23/ 24 |
| 14A    | TCAGGCAACTTTGAGACCTG | TCCCAGTATTTCCAGCCA     | 455      | 23     |
| 14B    | TCATCCATGCTGTGGTAGTC | TGGCCATTTCAGGACCTGATT  | 391      | 24     |
| 15     | TTTGGGCAGGTATGTAGGGA | GGAAGGTTGGGAGTCAAATATC | 288      | 25     |
