# Supplementary material for: Overexpression of the cohesin-core subunit SMC1A contributes to colorectal cancer development
Source: PubMed Central journal article supplement (PMC6397456; doi:10.1186/s13046-019-1116-0), 2019-03-01
Supplement: 13046_2019_1116_MOESM3_ESM.pdf [file 13046_2019_1116_MOESM3_ESM.pdf]

Supplementary Table 4. Number of reads in tumor samples analysed by RNA-seq

| Sample                       | Number of reads |
|------------------------------|-----------------|
| <b>HCT116</b>                |                 |
| 907_1                        | 31149558        |
| 907_2                        | 30456467        |
| 907_3                        | 36544210        |
| <b>HCT116 SMC1A wt</b>       |                 |
| 907_4                        | 28562037        |
| 907_5                        | 40149769        |
| 907_6                        | 34742567        |
| 907_7                        | 27359101        |
| <b>HCT116 SMC1A c.A2027G</b> |                 |
| 907_8                        | 26658634        |
| 907_9                        | 22050651        |
| 907_10                       | 36008327        |
| 907_11                       | 30471152        |
