# Supplementary material for: Overexpression of the cohesin-core subunit SMC1A contributes to colorectal cancer development
Source: PubMed Central journal article supplement (PMC6397456; doi:10.1186/s13046-019-1116-0), 2019-03-01
Supplement: 13046_2019_1116_MOESM4_ESM.pdf [file 13046_2019_1116_MOESM4_ESM.pdf]

Supplementary Table 5. Primers sequences used for validating RNA-seq data by RT-qPCR

| <b>Gene</b>    | <b>Forward primer sequence (5'-3')</b> | <b>Reverse primer sequence (5'-3')</b> |
|----------------|----------------------------------------|----------------------------------------|
| <i>ATG12</i>   | CTCAGTCGCTACTTCCGCTC                   | TTCGTGTTTCGCTCTACTGCC                  |
| <i>CHAF1A</i>  | TCCCATCTCGCTGAAGAGGA                   | CATACGTCACCCCTGCTCTC                   |
| <i>CEP55</i>   | CAATCTCTGCCCGCTCTGAT                   | CTCAAGGACTCGAATTTTCTCCA                |
| <i>CLDN4</i>   | GGCCGGCCTTATGGTGATAG                   | AGTAAGGCTTGTCTGTGCGG                   |
| <i>HIF1A</i>   | GACAAGCCACCTGAGGAGAG                   | GTGGCAACTGATGAGCAAGC                   |
| <i>H19</i>     | GAGCACCTTGGACATCTGGAG                  | GCCCTCGATCCCCTAAACCT                   |
| <i>KLF5</i>    | CCTCTCTCCCTGCTCATAGGC                  | ACTGGTCTACGACTGAGGCA                   |
| <i>SAT1</i>    | CTCCGGAAGGACACAGCATT                   | AAACATGCAACAACGCCACT                   |
| <i>STEAP4</i>  | CGCCTCTCCCTCAGTTATGG                   | CACAAACACCTGCCGACTTG                   |
| <i>TACSTD2</i> | TCACCAACCGGAGAAAGTCG                   | AGGAAGCGTGACTCACTTGG                   |
| <i>TOMM40</i>  | CTCTGACCTCTCCCCTAGCAG                  | TGAGACTGCCACTGTTGTCC                   |
