# Supplementary material for: Overexpression of the cohesin-core subunit SMC1A contributes to colorectal cancer development
Source: PubMed Central journal article supplement (PMC6397456; doi:10.1186/s13046-019-1116-0), 2019-03-01
Supplement: 13046_2019_1116_MOESM6_ESM.pdf [file 13046_2019_1116_MOESM6_ESM.pdf]

Supplementary Table 6. *SMC1A* synonymous variants identified in carcinoma samples.

| <b>Subject</b> | <b>Nucleotide change</b> | <b>Amino acid</b> | <b>Stage</b> |
|----------------|--------------------------|-------------------|--------------|
| 2              | c.A1350G                 | E450              | carcinoma    |
| 5              | c.C165T                  | N55               | carcinoma    |
| 5              | c.C1631T                 | A544              | carcinoma    |
| 9              | c.A942G                  | A314              | carcinoma    |
| 10             | c.C978T                  | Y326              | carcinoma    |
| 12             | c.A942G                  | A314              | carcinoma    |
