# Supplementary material for: Overexpression of the cohesin-core subunit SMC1A contributes to colorectal cancer development
Source: PubMed Central journal article supplement (PMC6397456; doi:10.1186/s13046-019-1116-0), 2019-03-01
Supplement: 13046_2019_1116_MOESM8_ESM.pdf [file 13046_2019_1116_MOESM8_ESM.pdf]

Supplementary Table 7. Prediction of mutation effects on SMC1A protein.

| <b>Amino acid change</b> | <b>Effect (Mutation Tester)</b> | <b>Effect (PolyPhen2)</b> |
|--------------------------|---------------------------------|---------------------------|
| <b>Adenoma</b>           |                                 |                           |
| S14P                     | Probably deleterious            | Probably damaging         |
| D207G                    | Probably harmless               | Benign                    |
| S653P                    | Probably deleterious            | Probably damaging         |
| I849V                    | Probably harmless               | Benign                    |
| N888D                    | Probably harmless               | Benign                    |
| D1063N                   | Probably harmless               | Benign                    |
| L1141F                   | Probably harmless               | Probably damaging         |
| <b>Carcinoma</b>         |                                 |                           |
| I299T                    | Probably deleterious            | Probably damaging         |
| K317R                    | Probably deleterious            | Probably damaging         |
| V343M                    | Probably deleterious            | Probably damaging         |
| Q483R                    | Probably deleterious            | Probably damaging         |
| T535I                    | Probably deleterious            | Probably damaging         |
| G643E                    | Probably deleterious            | Probably damaging         |
| A656T                    | Probably deleterious            | Probably damaging         |
| E676G                    | Probably deleterious            | Benign                    |
| Q756P                    | Probably deleterious            | Probably damaging         |
| S757G                    | Probably harmless               | Benign                    |
| D833G                    | Probably harmless               | Benign                    |
| M935T                    | Probably deleterious            | Probably damaging         |
| M935V                    | Probably deleterious            | Probably damaging         |
| E1032K                   | Probably deleterious            | Probably damaging         |
| F1182L                   | Probably harmless               | Benign                    |
