# Supplementary material for: Overexpression of the cohesin-core subunit SMC1A contributes to colorectal cancer development
Source: PubMed Central journal article supplement (PMC6397456; doi:10.1186/s13046-019-1116-0), 2019-03-01

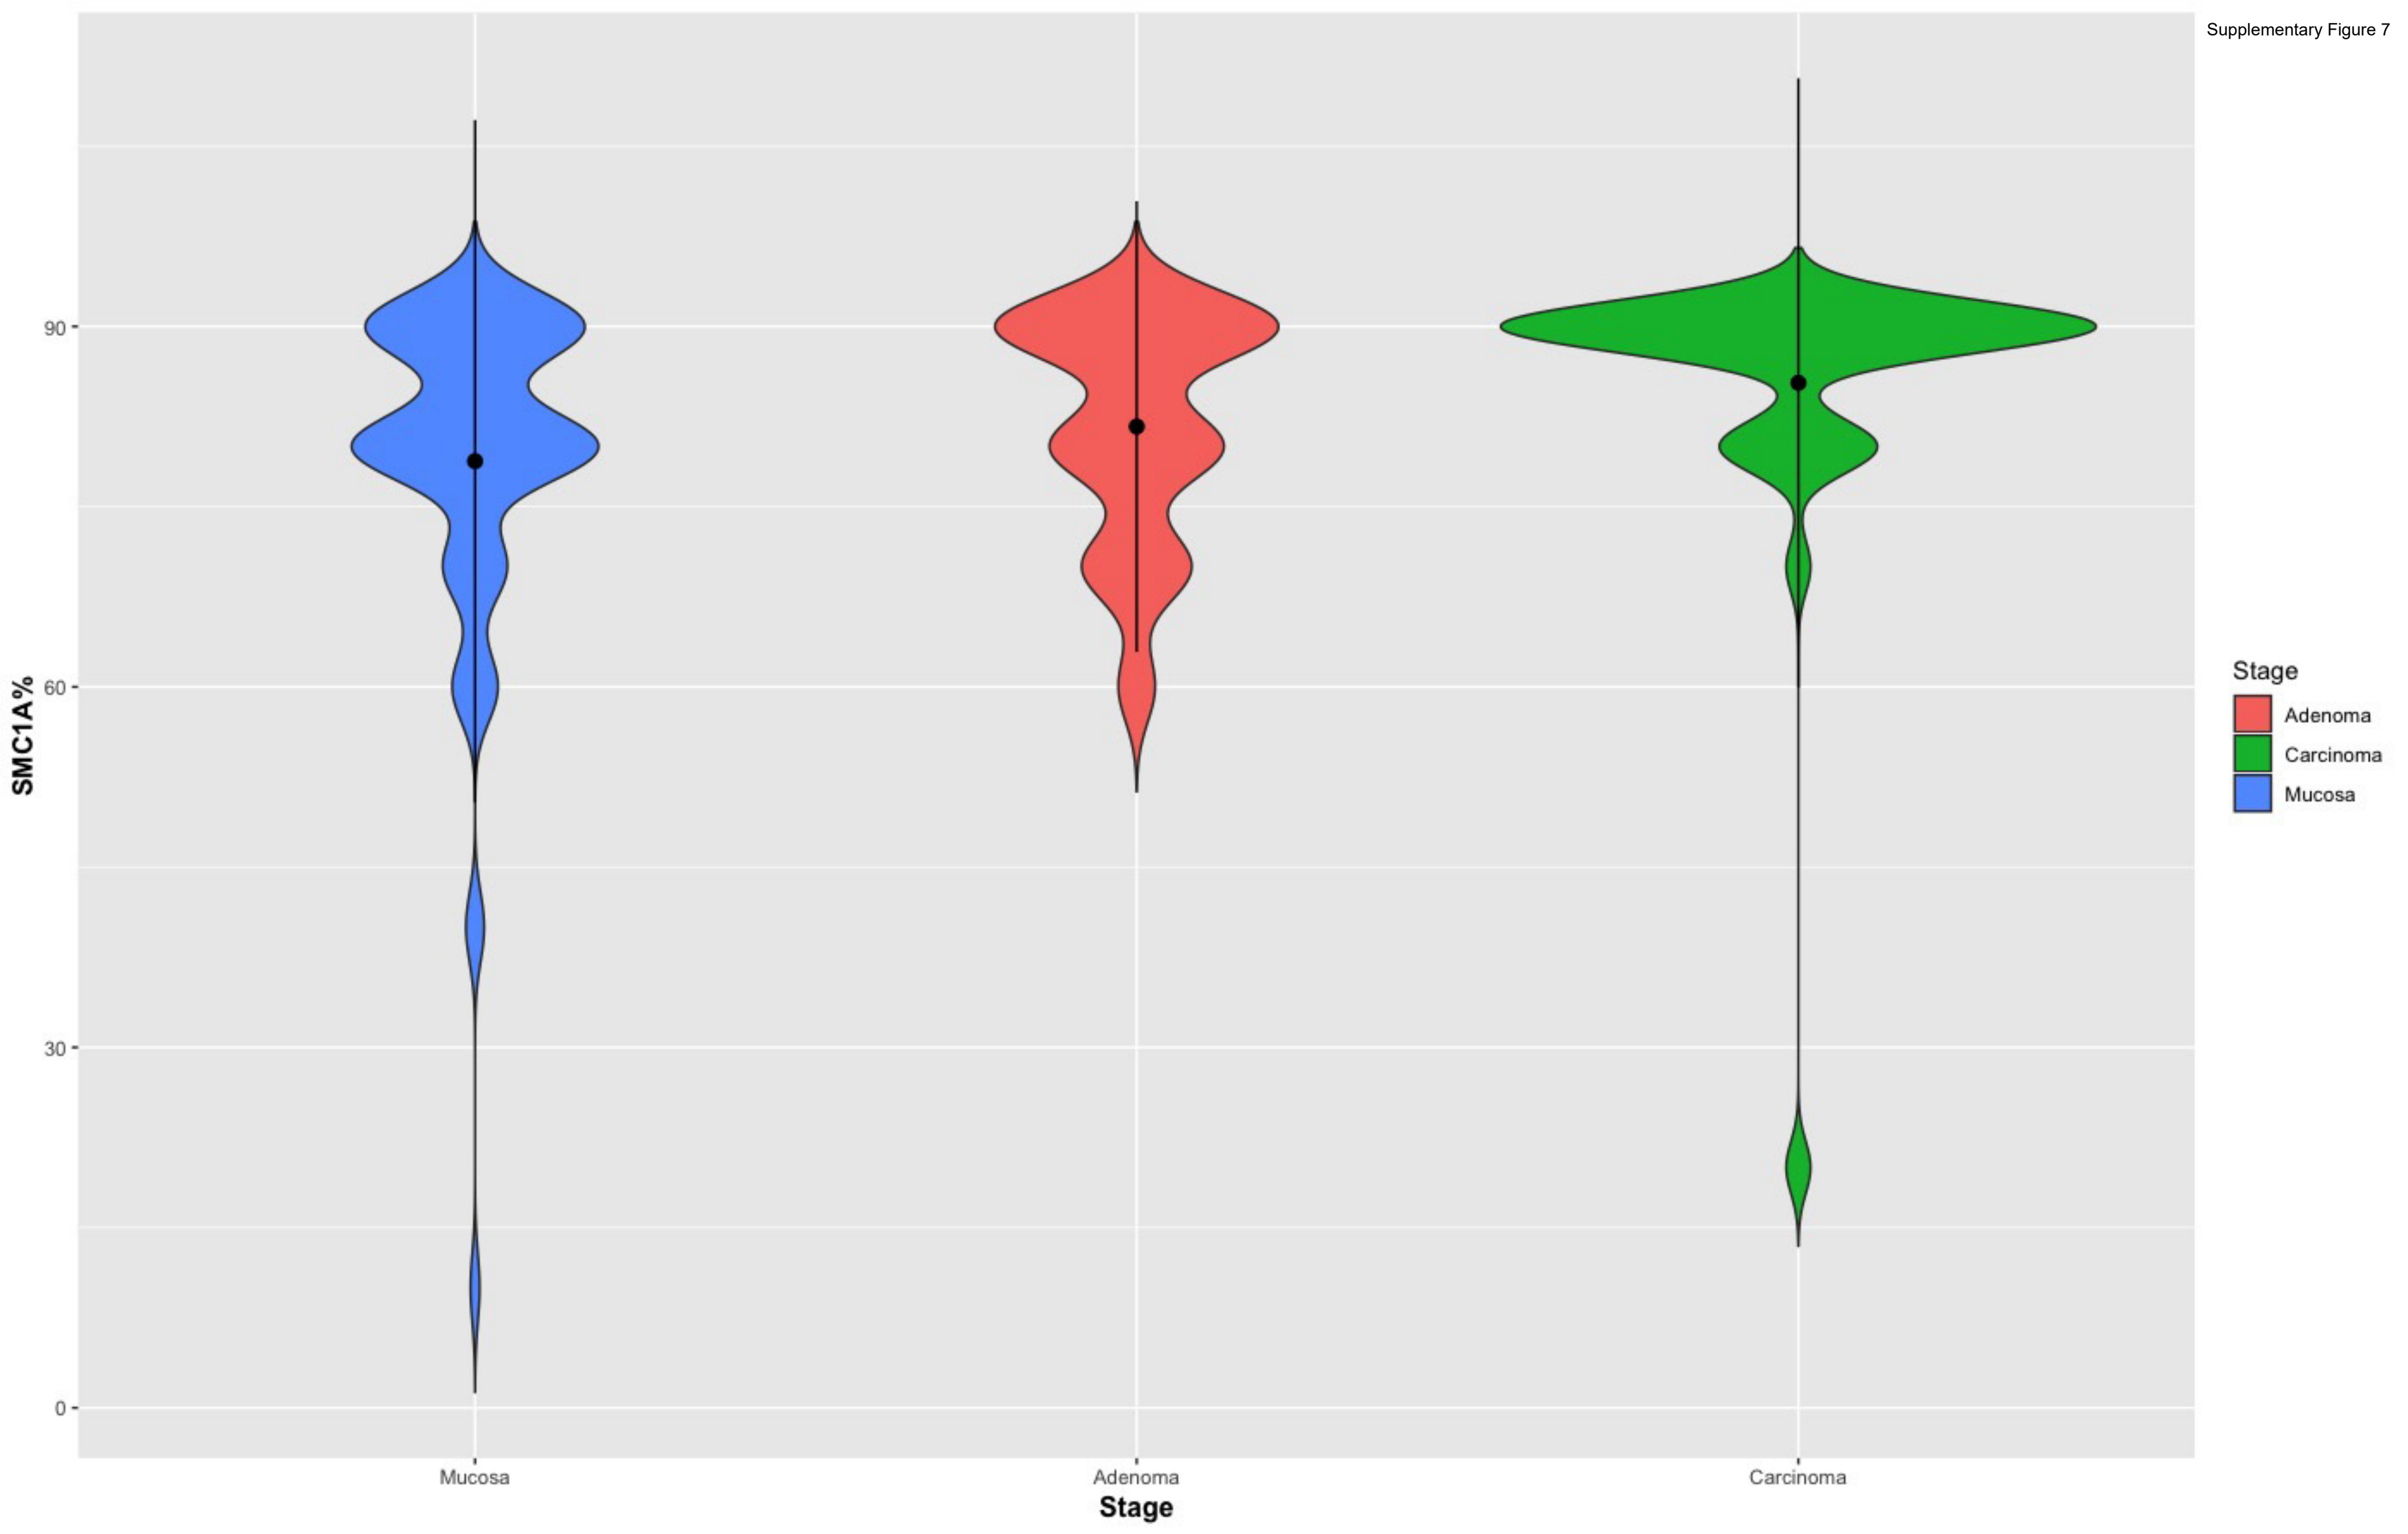

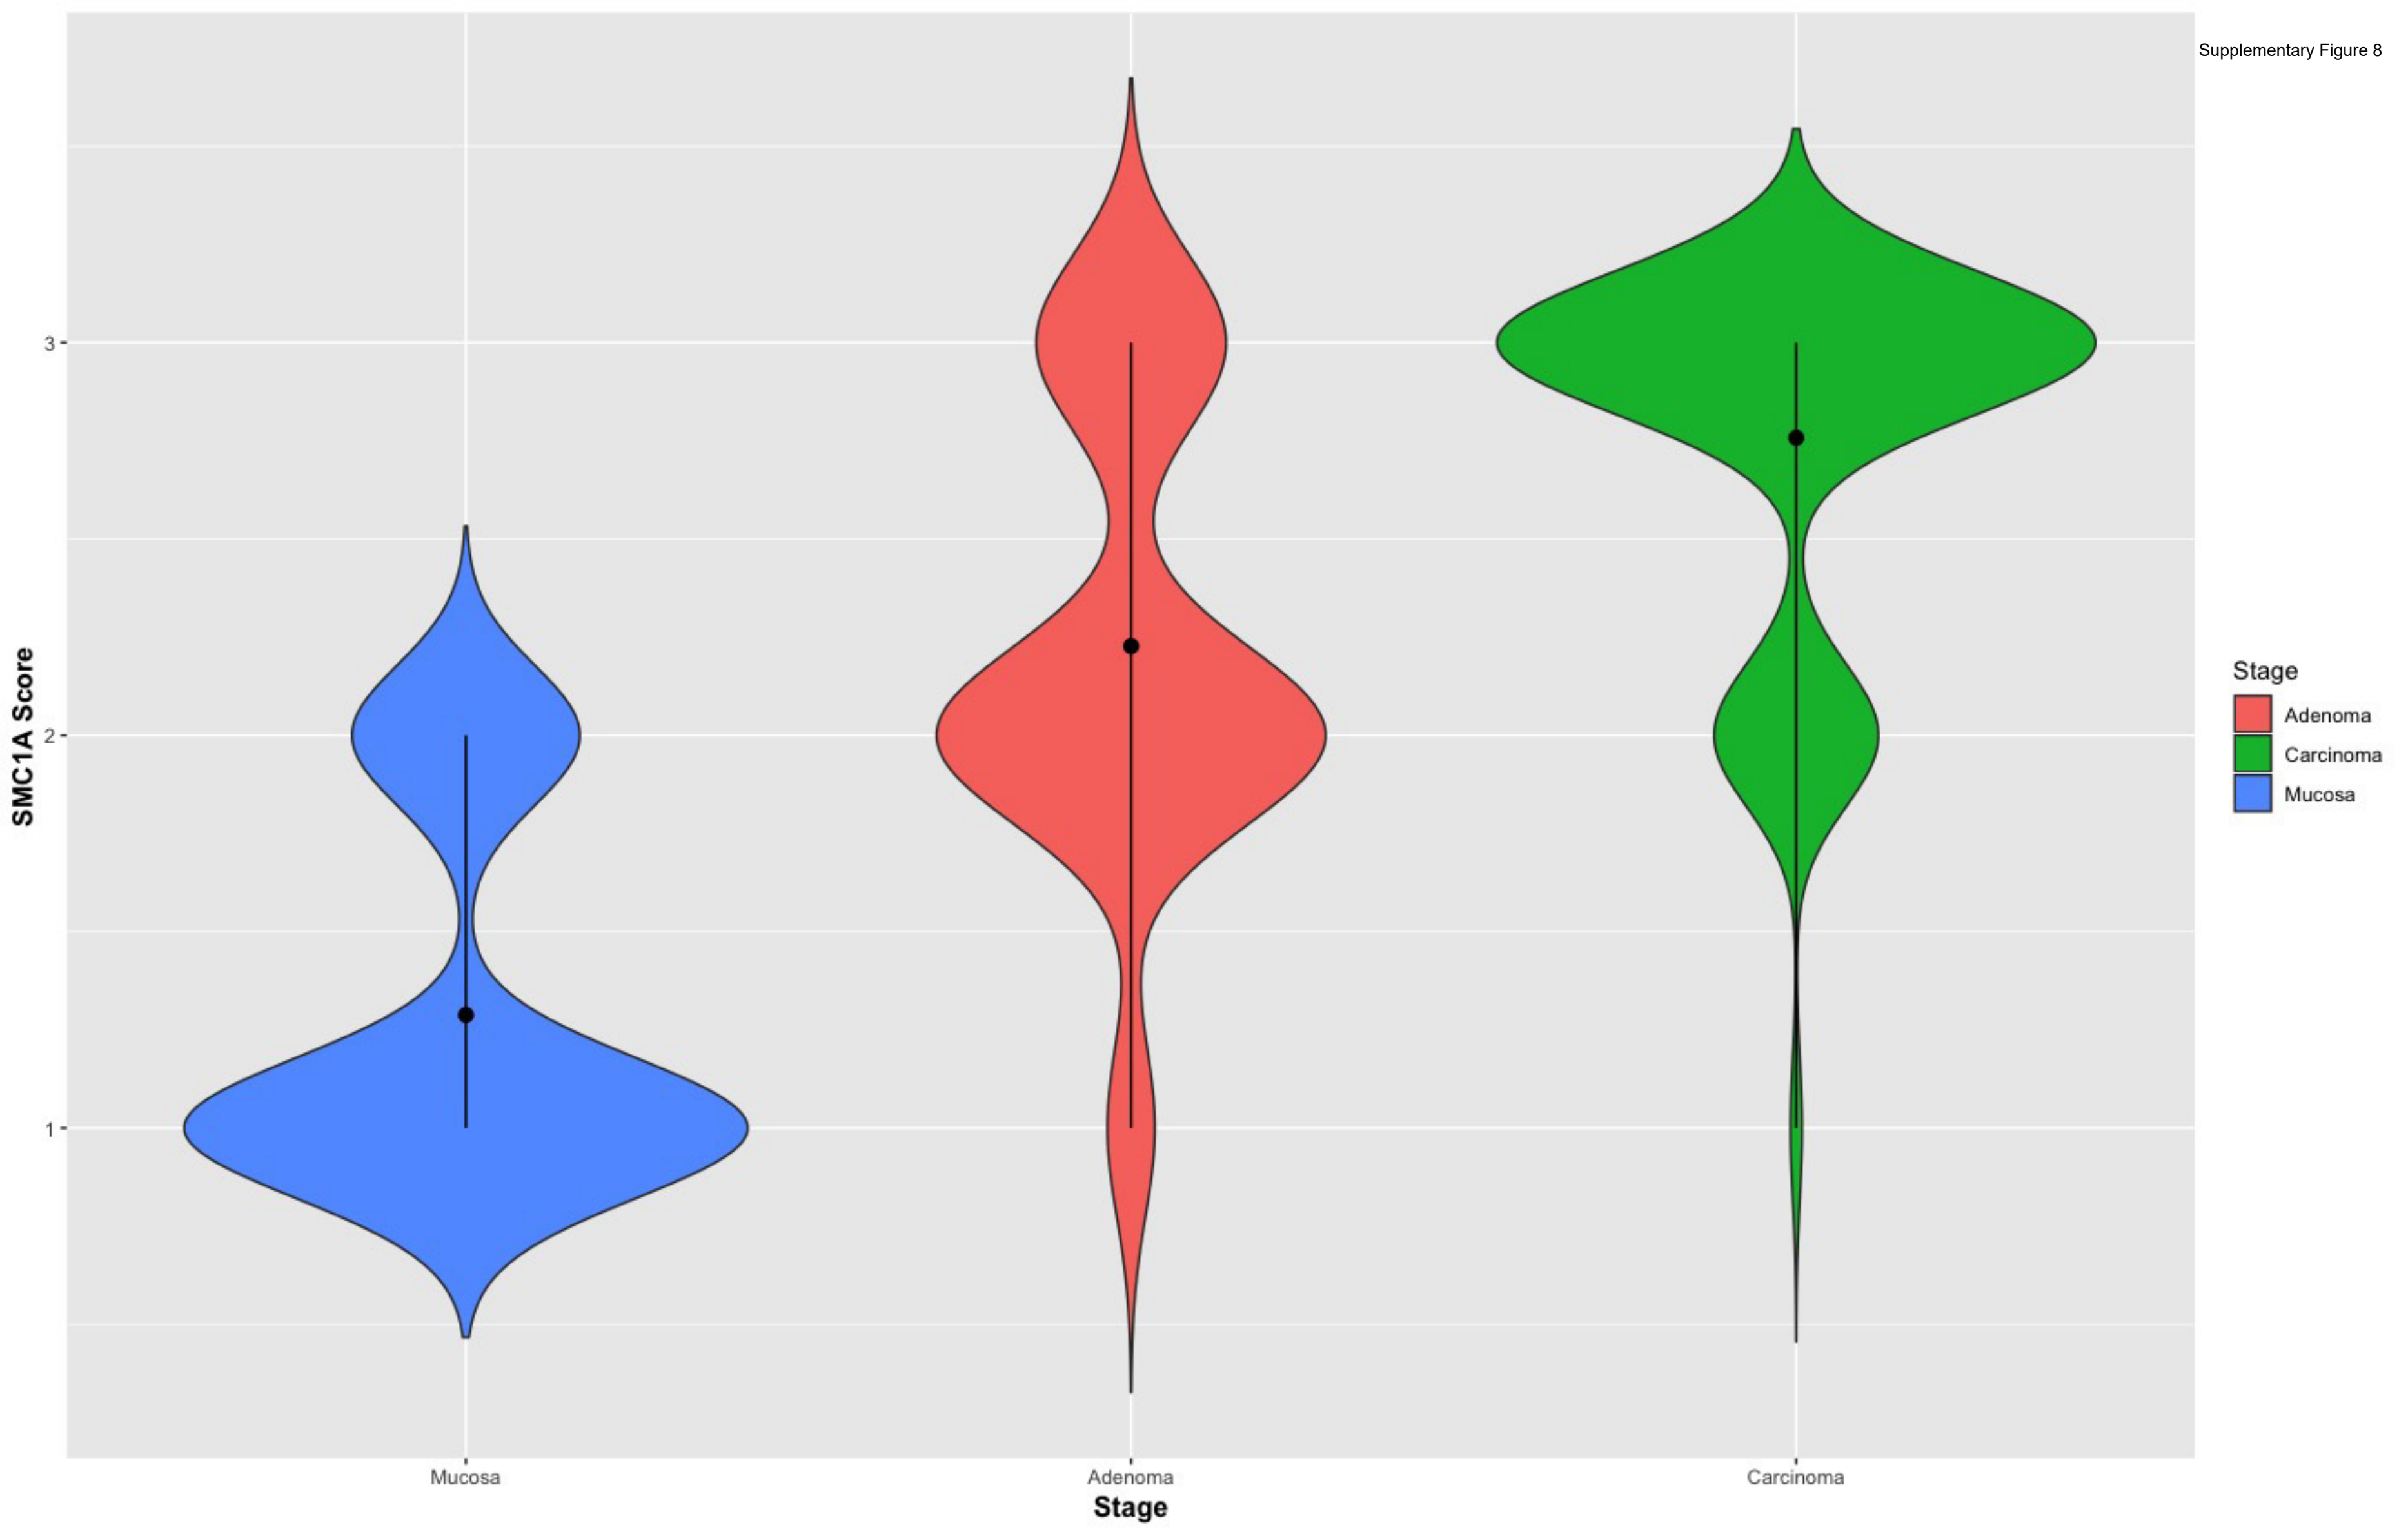

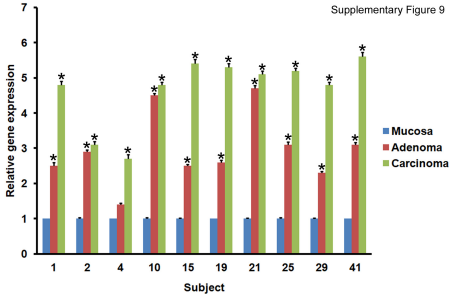

Supplement: 13046_2019_1116_MOESM9_ESM.pdf [file 13046_2019_1116_MOESM9_ESM.pdf]
