# Supplementary material for: Overexpression of the cohesin-core subunit SMC1A contributes to colorectal cancer development
Source: PubMed Central journal article supplement (PMC6397456; doi:10.1186/s13046-019-1116-0), 2019-03-01
Supplement: 13046_2019_1116_MOESM10_ESM.pdf [file 13046_2019_1116_MOESM10_ESM.pdf]

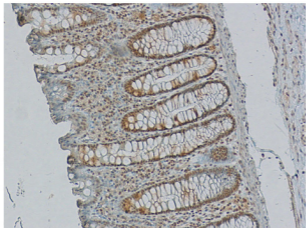

Mucosa

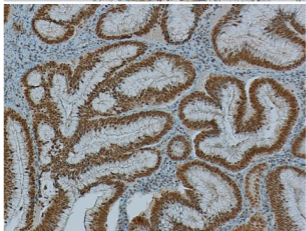

Adenoma

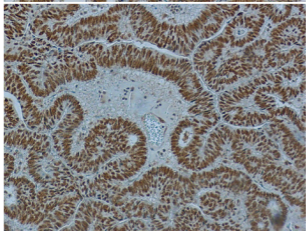

Carcinoma
