# Supplementary material for: Overexpression of the cohesin-core subunit SMC1A contributes to colorectal cancer development
Source: PubMed Central journal article supplement (PMC6397456; doi:10.1186/s13046-019-1116-0), 2019-03-01
Supplement: 13046_2019_1116_MOESM12_ESM.pdf [file 13046_2019_1116_MOESM12_ESM.pdf]

Supplementary Figure 12

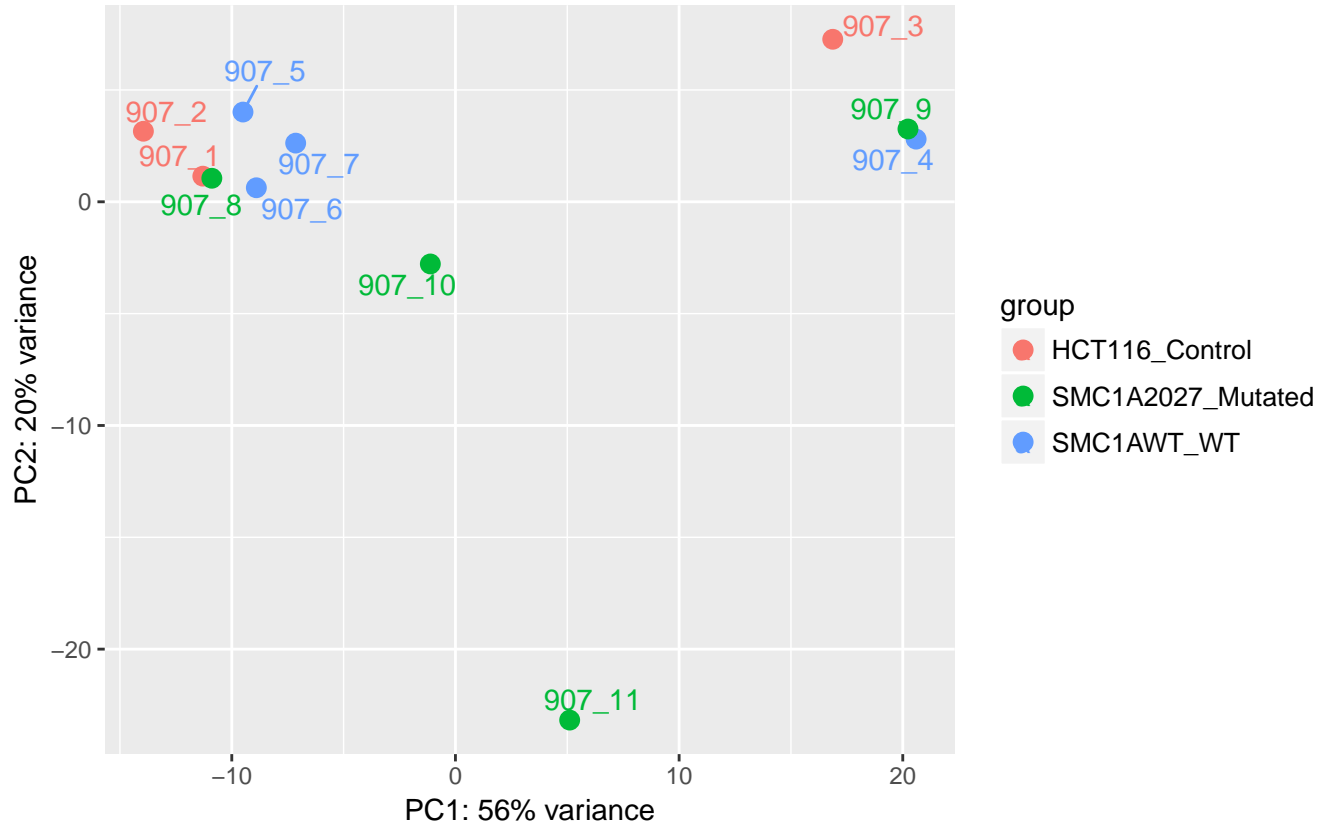

Supplementary Table 8. Dysregulated genes in HCT116 SMC1A wild-type induced tumours.\*

| GENE     | LogFoldChange      |
|----------|--------------------|
| AAGAB    | 0.257195505268628  |
| AAK1     | -0.259209914505657 |
| AARS     | 0.275755961297007  |
| AATK     | 0.317743470447403  |
| ABCA7    | 0.328425958812578  |
| ABCC9    | -0.296818341831637 |
| ABCE1    | 0.189115907721298  |
| ABR      | -0.232414568605627 |
| ACAT2    | 0.370296611445516  |
| ACLY     | 0.342525357570985  |
| ACP5     | -0.424234730324524 |
| ACSL1    | 0.34623272557512   |
| ACTN2    | -0.305073134774558 |
| ADAM19   | -0.391753344872023 |
| ADRA2C   | 0.30463519288772   |
| ADSSL1   | -0.504075226628719 |
| AEN      | 0.35100928102763   |
| AFF1     | -0.299472854413335 |
| AFMID    | 0.311909282690368  |
| AGAP2    | -0.32199476323605  |
| AHR      | -0.300824739838227 |
| AIG1     | -0.27600989295451  |
| AIM1     | -0.448431553816241 |
| AKAP1    | 0.38323060391067   |
| ALDH1A2  | 0.187012770890331  |
| ALG10B   | -0.3502405022552   |
| AMOT     | -0.455509916947733 |
| ANK3     | -0.412806957520431 |
| ANKH     | -0.401600484311432 |
| ANKIB1   | 0.226469831741101  |
| ANKRD12  | -0.282681039199523 |
| ANKRD13C | 0.317683634527258  |
| ANKRD50  | -0.257774971678996 |

|          |                    |
|----------|--------------------|
| ANKRD6   | -0.366587624317033 |
| ANTXR1   | -0.397892247662371 |
| AOC1     | -0.400216913742196 |
| APBB2    | -0.266750603164767 |
| APEX2    | 0.318130158287071  |
| APOBEC3F | -0.40609520975204  |
| APOBEC3G | -0.351912500353647 |
| APP      | -0.279391667650687 |
| ARHGAP15 | 0.204407220325916  |
| ARL4C    | -0.807044507203783 |
| ARMC6    | 0.332478391863256  |
| ARSD     | -0.328180137673103 |
| ASNS     | 0.266555393006516  |
| ATAD3A   | 0.36276530394268   |
| ATAD3B   | 0.508094005063599  |
| ATF7     | -0.266602494262384 |
| ATIC     | 0.213412715205768  |
| ATL1     | -0.360225248147336 |
| ATP1B1   | -0.319290349323386 |
| ATP5G1   | 0.425584837253913  |
| ATP5SL   | 0.267708195497243  |
| ATP6V0D2 | -0.350598582220353 |
| ATP7A    | -0.272816936127816 |
| AURKB    | 0.257454209308817  |
| B3GALT2  | 0.1528112162524    |
| BAIAP3   | -0.379826797282775 |
| BAMBI    | 0.378974461890319  |
| BANK1    | -0.514483020939182 |
| BAX      | 0.332263634554294  |
| BAZ2B    | -0.29504286972829  |
| BBS9     | -0.365322718674895 |
| BBX      | -0.285655153823905 |
| BCAM     | -0.381390200796552 |
| BCCIP    | 0.260969916561289  |
| BCL6     | -0.325194469570686 |
| BCL9     | -0.239762306870723 |

|          |                    |
|----------|--------------------|
| BCORL1   | -0.378896137789005 |
| BCS1L    | 0.32477020182322   |
| BMP8B    | -0.354176158567242 |
| BMPR2    | -0.335160468307665 |
| BVES     | -0.731955827389588 |
| C10orf2  | 0.292034095069476  |
| C12orf60 | -0.336235911211453 |
| C16orf45 | -0.3204572109994   |
| C17orf96 | 0.372383487092423  |
| C19orf10 | 0.374631608489662  |
| C21orf59 | 0.316900609894715  |
| C3orf55  | 0.223195164631308  |
| C4orf32  | -0.396209947058403 |
| C7orf25  | -0.374671198171987 |
| C9orf3   | -0.35803833688883  |
| CALB1    | 0.423033976519607  |
| CALCOCO1 | -0.395081168040385 |
| CALCRL   | -0.37530497652212  |
| CAMK2D   | -0.299406555941959 |
| CAMK2N1  | -0.291642729000945 |
| CAPN15   | 0.490416383803443  |
| CARD11   | 0.301295426208369  |
| CARS2    | 0.410271628131444  |
| CASC21   | 0.154531590497367  |
| CASP4    | -0.426316260984571 |
| CCAR2    | 0.255567047348368  |
| CCDC120  | -0.335090578809224 |
| CCDC171  | -0.36440326778678  |
| CCDC7    | -0.32413204266089  |
| CCDC71L  | -0.382258851651031 |
| CCL5     | 0.190821410698267  |
| CCNE2    | 0.27798867931557   |
| CCNH     | -0.259874814928516 |
| CD109    | -0.288469706016845 |
| CD36     | 0.440399202981817  |
| CD59     | -0.267952318441605 |

|            |                    |
|------------|--------------------|
| CDC123     | 0.260900073314936  |
| CDC25A     | 0.279386988419022  |
| CDC42EP3   | -0.28385230165305  |
| CDC6       | 0.311970362551564  |
| CDH15      | -0.315176932535032 |
| CDH3       | -0.265862096625495 |
| CDH5       | -0.27905624569307  |
| CDIP1      | 0.337041053328545  |
| CDKL5      | -0.333938342507348 |
| CDR2L      | 0.348739482987008  |
| CDX2       | 0.344542328730084  |
| CEMIP      | -0.29387585555453  |
| CENPW      | 0.322942101151209  |
| CFLAR      | -0.35176398786478  |
| CGREF1     | -0.312132939873099 |
| CHD3       | 0.264412208174053  |
| CHD6       | -0.407955654766142 |
| CHKA       | 0.408988895816043  |
| CHPF       | -0.400554176006606 |
| CHPT1      | 0.32974282207869   |
| CHRNB4     | -0.346356970758761 |
| CHST2      | -0.396627751868336 |
| CLDN3      | -0.329393903341546 |
| CLIP4      | -0.313085169570064 |
| CLMN       | -0.258659458081901 |
| CLPTM1L    | 0.220135128417881  |
| CLSTN1     | -0.208881487034634 |
| CMAHP      | 0.225560804086764  |
| CMC2       | 0.364860274961563  |
| CMTM8      | -0.314960712386703 |
| CNTN1      | -0.418999979132517 |
| COL18A1    | -0.342674294509519 |
| COL4A4     | -0.420832544778452 |
| COPS3      | 0.286237620722999  |
| CREB3L2    | -0.1714509066321   |
| CSGALNACT1 | -0.401147964329454 |

|          |                    |
|----------|--------------------|
| CTBS     | -0.362642807239314 |
| CTGF     | -0.401259718129015 |
| CTHRC1   | -0.365456988605039 |
| CTIF     | -0.326186501242525 |
| CXXC4    | -0.357615254293887 |
| CYC1     | 0.301154505831709  |
| CYP51A1  | 0.292448741588535  |
| DANCR    | 0.258564661080187  |
| DAPK1    | 0.336402136181401  |
| DAZAP1   | 0.256786497968883  |
| DCAF10   | -0.238115986254263 |
| DDN      | 0.322338752981314  |
| DDX21    | 0.183142748717864  |
| DDX27    | 0.390087367768139  |
| DHCR7    | 0.498567690617035  |
| DHX37    | 0.39371136888326   |
| DIRAS3   | -0.356580876577708 |
| DLG4     | -0.337268958480129 |
| DNAJC4   | -0.347639975325891 |
| DNER     | -0.552161901360006 |
| DOCK9    | -0.230163836476576 |
| DOHH     | 0.319334334642219  |
| DPEP1    | 0.387970292602922  |
| DPH2     | 0.396080693967835  |
| DPH5     | 0.267420563983902  |
| DPP4     | 0.461949675725578  |
| DSC2     | -0.345790943397984 |
| DSC3     | -0.953520584150088 |
| DSG2     | -0.237225791445901 |
| DST      | -0.274597987810162 |
| DTNB     | -0.31553061230249  |
| DUSP6    | -0.642105998712446 |
| DUSP9    | 0.349291514970916  |
| DVL2     | 0.339653827987389  |
| E2F8     | 0.326381549186617  |
| EBNA1BP2 | 0.321953173081668  |

|          |                    |
|----------|--------------------|
| EDAR     | -0.242395832166296 |
| EDIL3    | -0.319030631416905 |
| EFNB1    | 0.340985222842039  |
| EGFR     | -0.350345450028773 |
| EI24     | 0.2608592399309    |
| EIF2B4   | 0.291341752533544  |
| EIF3L    | 0.218768994129938  |
| EIF4G1   | 0.181960131947056  |
| ENDOD1   | -0.330823728878296 |
| ENPP1    | -0.293772214972203 |
| EPB41    | -0.306783704567434 |
| EPB41L1  | 0.229228315905988  |
| EPB41L4A | -0.52481672292793  |
| EPGN     | -0.271664183243779 |
| EPHA4    | -0.409302422169598 |
| EPS8     | -0.420873936962443 |
| ERAP1    | -0.37722867502214  |
| ERV3-1   | -0.445322916063965 |
| ESPN     | -0.298778746802322 |
| ETS2     | -0.310233021840904 |
| ETV5     | -0.313108717768018 |
| ETV6     | -0.44183071570444  |
| EVPL     | -0.280288288917123 |
| EXO1     | 0.309186282037941  |
| EXOSC2   | 0.325604211406817  |
| EXOSC7   | 0.30774318947293   |
| FADS1    | 0.240618239226551  |
| FAM102B  | -0.266662527930424 |
| FAM107B  | -0.268081763262497 |
| FAM129A  | -0.425370287157921 |
| FAM136A  | 0.325399672525307  |
| FAM149B1 | -0.315192093921688 |
| FAM160A1 | -0.350247653610879 |
| FAM168A  | -0.334227430479965 |
| FAM168B  | 0.263192491045555  |
| FAM73A   | -0.291818645448864 |

|         |                    |
|---------|--------------------|
| FAM98A  | 0.252099119754972  |
| FARSA   | 0.286458882647516  |
| FAT4    | -0.359372749017622 |
| FBL     | 0.347745384809143  |
| FBXO25  | -0.306638660048313 |
| FDFT1   | 0.533855066394451  |
| FDPS    | 0.442535197316768  |
| FGFBP1  | 0.560711084241693  |
| FHOD3   | -0.399759972312362 |
| FKBP10  | -0.353888540765525 |
| FNDC3A  | -0.210307475974541 |
| FOXC1   | -0.360717291919431 |
| FOXJ2   | -0.229895660528208 |
| FUT8    | -0.420361548555783 |
| GAL     | 0.311822763081095  |
| GALNT18 | 0.302011738839186  |
| GART    | 0.450262014607657  |
| GATA6   | -0.384138559335309 |
| GCN1L1  | 0.263036131602262  |
| GCNT3   | 0.319919725579332  |
| GEMIN4  | 0.246459176229852  |
| GEMIN5  | 0.409856077074342  |
| GLG1    | -0.246481879588226 |
| GLI2    | -0.422995281814268 |
| GLOD4   | 0.281981759041368  |
| GLT8D2  | -0.432970959235962 |
| GNA13   | -0.183194442666184 |
| GNL3    | 0.360403025838563  |
| GOT1    | 0.312052179525158  |
| GOT2    | 0.287200064075466  |
| GPC4    | -0.502365412562771 |
| GPR155  | -0.41486674595937  |
| GPR176  | -0.28963601788076  |
| GPRIN1  | 0.279204129842352  |
| GPRIN3  | -0.485676758927356 |
| GRAMD1C | -0.360291895379658 |



|           |                    |
|-----------|--------------------|
| GTPBP4    | 0.213164507889711  |
| GUF1      | 0.314088499497573  |
| HBE1      | -0.34221235147982  |
| HDAC9     | -0.571961017131127 |
| HDGF      | 0.197514809070704  |
| HEATR1    | 0.298624713133005  |
| HEATR2    | 0.236812790101887  |
| HIAT1     | 0.26992681055591   |
| HINT3     | -0.284520855393745 |
| HIPK2     | -0.245085703823149 |
| HIST1H2AB | 0.323111782898048  |
| HIST1H4B  | 0.324315047060605  |
| HIST1H4H  | 0.332311919315903  |
| HIVEP3    | -0.461401920646205 |
| HMGCR     | 0.310099813039265  |
| HMGCS1    | 0.662282566320652  |
| HNF4A     | 0.610763528541728  |
| HNRNPA1L2 | 0.336393845898903  |
| HNRNPH3   | 0.301165948406028  |
| HSD17B1   | 0.312872860393637  |
| HSPH1     | 0.323224634480135  |
| HTR7      | 0.389867067728204  |
| HTRA2     | 0.344309419232055  |
| HYAL3     | 0.346425768917966  |
| IARS      | 0.229059088217272  |
| IDI1      | 0.376064334093267  |
| IDS       | -0.322492490343524 |
| IFRD2     | 0.324366521579996  |
| IGF1R     | -0.434136415571556 |
| IGHMBP2   | 0.41843879309082   |
| IKZF2     | -0.397058347393019 |
| IL17RD    | -0.340417966670502 |
| IL31RA    | -0.224183891149059 |
| INHBB     | -0.31738108859941  |
| INPP4B    | -0.498333939861476 |
| INSIG1    | 0.57225242618358   |

|          |                    |
|----------|--------------------|
| INSR     | -0.238763920992794 |
| ITGA2    | -0.267754666582377 |
| ITGA3    | -0.216246103274383 |
| ITGB8    | -0.616490870370596 |
| ITM2B    | -0.429589993008572 |
| ITM2C    | -0.237301287480349 |
| ITPK1    | 0.243443352830973  |
| ITPR2    | -0.273319158778295 |
| ITPR3    | -0.259926120107556 |
| JOSD1    | 0.232343809578644  |
| KARS     | 0.256635071902237  |
| KAT2A    | 0.30936789257325   |
| KAT6B    | -0.287941783073261 |
| KATNAL1  | -0.274034207949398 |
| KCNH3    | 0.238882357700156  |
| KCNJ12   | 0.314044448509362  |
| KCNJ2    | -0.316338634817345 |
| KCNK9    | -0.342761128627272 |
| KDSR     | -0.265568915848245 |
| KIAA0100 | 0.258522719126662  |
| KIAA0355 | -0.278332243735125 |
| KIAA0430 | -0.215386392267727 |
| KIAA1109 | -0.319349269122758 |
| KIAA1161 | -0.307730745466755 |
| KIAA1462 | -0.498634463812353 |
| KIF13B   | -0.304907452954726 |
| KIF5C    | -0.325325966868366 |
| KLF12    | -0.490244513121331 |
| KLHL5    | -0.374553593891    |
| KLK6     | -0.40215086968514  |
| KLK7     | -0.444217757490484 |
| KRT14    | 0.332045396330618  |
| KRT17    | 0.412661700970999  |
| KRT23    | -0.342912681511318 |
| KRT4     | 0.177857822891364  |
| L1CAM    | -0.387477476531504 |

|           |                    |
|-----------|--------------------|
| LAMB1     | -0.307372799665975 |
| LAMP2     | -0.258503148674657 |
| LBX2      | -0.317408965522914 |
| LCAT      | 0.219812551535849  |
| LCOR      | -0.317484361769666 |
| LCORL     | -0.358459616581006 |
| LEPR      | -0.357421128677142 |
| LETM1     | 0.308107009633409  |
| LHX5      | 0.267758975109371  |
| LIMCH1    | -0.552554607646358 |
| LINC00592 | -0.302782011295304 |
| LINC00669 | -0.309486030784143 |
| LMBRD1    | -0.277487489706672 |
| LOC730102 | -0.384950349234989 |
| LPAR6     | -0.214304456456457 |
| LPCAT2    | -0.328958457184824 |
| LPIN1     | 0.306182308720482  |
| LPL       | 0.39416368528743   |
| LPP       | -0.277217910596227 |
| LRRC59    | 0.209189540602028  |
| LSM7      | 0.378266031401137  |
| LTBP3     | -0.456165691634522 |
| LTV1      | 0.286337384603532  |
| LY6D      | 0.361399248994698  |
| LYN       | 0.319485227043106  |
| MACC1     | -0.417753505278593 |
| MAML2     | -0.656717727044327 |
| MAN1A1    | -0.237770225073471 |
| MAN2B2    | -0.355220341255484 |
| MAP2      | -0.346004625003361 |
| MAP3K1    | -0.295583956427299 |
| MAP3K13   | -0.265292675878596 |
| MAP3K5    | -0.258087687588202 |
| MAST4     | -0.366393570570354 |
| MAT1A     | -0.390621763883667 |
| MATN2     | -0.376799972765778 |

|        |                    |
|--------|--------------------|
| MBNL3  | -0.735831655177537 |
| MCM10  | 0.236793695407531  |
| MCOLN3 | -0.368588630150577 |
| MDN1   | 0.267238940325519  |
| MEA1   | 0.305156404221312  |
| MEF2A  | -0.264980874820387 |
| MEF2C  | -0.413096799324332 |
| MEIS2  | -0.327019731357942 |
| MFN2   | 0.18756614780069   |
| MGAT1  | 0.253646263114823  |
| MGAT4A | -0.392689782602891 |
| MISP   | 0.440311809640813  |
| MLXIP  | 0.262968521378506  |
| MMP13  | -0.511976068319114 |
| MMS19  | 0.295244053583926  |
| MPDU1  | 0.278988500148708  |
| MRC2   | -0.35642494214737  |
| MRM1   | 0.31323545131557   |
| MRPL2  | 0.353744378644279  |
| MRPL47 | 0.288686925377242  |
| MRPS2  | 0.270006730247582  |
| MRPS27 | 0.20718029237228   |
| MRTO4  | 0.341773030326097  |
| MSLN   | -0.292527606570497 |
| MT1E   | -0.41255909667121  |
| MT2A   | -0.328935733302526 |
| MTA3   | -0.231394853759568 |
| MTHFD2 | 0.291725122074417  |
| MTMR10 | -0.282080682910882 |
| MUM1L1 | -0.467701584418817 |
| MVD    | 0.59686433662287   |
| MVK    | 0.387979586823337  |
| MYBL2  | 0.320842240307653  |
| MYLK   | -0.347446097110236 |
| MYO1D  | -0.287272161200785 |
| MYO6   | -0.253911662542727 |

|           |                    |
|-----------|--------------------|
| NADK      | 0.293148940011098  |
| NARS      | 0.331874802181501  |
| NCLN      | 0.260623141286942  |
| NCMAP     | -0.347171593470575 |
| NCOA3     | -0.232428531526654 |
| NCOA7     | -0.34475742530724  |
| NDUFAF2   | 0.41484609142773   |
| NDUFB9    | 0.271487950294719  |
| NDUFS3    | 0.249044059066993  |
| NEDD4L    | -0.265765641736247 |
| NELFA     | 0.259781850728877  |
| NEO1      | -0.316736135663626 |
| NES       | -0.339984889151504 |
| NET1      | -0.292100048595723 |
| NFAT5     | -0.37326364385186  |
| NFATC2    | -0.302537642424023 |
| NFIA      | 0.371252630735864  |
| NFS1      | 0.361102845269564  |
| NHS       | -0.48411483203896  |
| NHSL1     | -0.358267153845178 |
| NIPSNAP3A | -0.323685509550688 |
| NLE1      | 0.368947446145257  |
| NOL4L     | -0.428507478994152 |
| NOP16     | 0.39855818206197   |
| NOP56     | 0.319187001278092  |
| NOS1      | -0.186871067358832 |
| NOTCH3    | -0.288230840221759 |
| NPM3      | 0.417911168042869  |
| NPTXR     | -0.32132219633896  |
| NR2C2     | -0.255284050741543 |
| NSMF      | 0.251403214622915  |
| NT5E      | -0.329446250792803 |
| NTHL1     | 0.367520124281651  |
| NUMA1     | -0.268631483905481 |
| NUP85     | 0.26950865626432   |
| NUP88     | 0.260427571569145  |

|          |                    |
|----------|--------------------|
| NUP93    | 0.271985482616293  |
| ODC1     | 0.29666829300021   |
| OR51B5   | -0.357778956270472 |
| ORC1     | 0.266578227253527  |
| ORC6     | 0.370821341897704  |
| OS9      | -0.294705853510904 |
| OSBPL10  | -0.3755448947767   |
| OTUB2    | -0.332452710795969 |
| PACSIN1  | -0.340332347947638 |
| PAK1IP1  | 0.303972036285     |
| PALLD    | 0.367403753610032  |
| PAQR8    | -0.415347920391825 |
| PARK7    | 0.238955466489735  |
| PARP4    | -0.18268668736799  |
| PARP8    | -0.278121165900193 |
| PARVA    | -0.256070977935809 |
| PASK     | 0.437350850522596  |
| PBRM1    | -0.243959866780905 |
| PCDH1    | -0.372924207520404 |
| PCDHGA10 | -0.3344992979216   |
| PCDHGB2  | -0.476246807494925 |
| PCLO     | -0.27809876523534  |
| PCNA     | 0.302208033491773  |
| PCSK9    | 0.323988570410763  |
| PDCD11   | 0.22626876419687   |
| PDCD2    | 0.26278817170419   |
| PDCD2L   | 0.359548561879953  |
| PDHA1    | 0.212351240003052  |
| PDRG1    | 0.382966486762729  |
| PDXK     | 0.230628039196501  |
| PEAK1    | -0.305199602549576 |
| PEG10    | -0.379651780048928 |
| PFAS     | 0.483581338771645  |
| PGAM5    | 0.433630303449444  |
| PGM2L1   | -0.401433499124968 |
| PHB2     | 0.276209023672395  |

|         |                    |
|---------|--------------------|
| PHF5A   | 0.328091619307062  |
| PHLDA1  | -0.242355951114431 |
| PHLPP1  | -0.289818307517755 |
| PI15    | 0.293573495253884  |
| PIK3CA  | -0.233242519618866 |
| PIK3R1  | -0.417649041833526 |
| PLBD1   | 0.282728615785825  |
| PLCB1   | -0.313880027397478 |
| PLD1    | -0.374342409363191 |
| PLEKHA3 | -0.420544522624506 |
| PLEKHA5 | -0.385709348381763 |
| PLEKHB1 | -0.475373276478429 |
| PLEKHS1 | -0.226964193075027 |
| PLSCR4  | -0.459954201614126 |
| PML     | -0.263445642227687 |
| PMPCA   | 0.263987867086554  |
| PNMA2   | -0.533758841824297 |
| PNP     | 0.386143863246609  |
| POLD2   | 0.225401839618434  |
| POLG    | 0.426554214033186  |
| POLI    | -0.31491497179535  |
| POLK    | -0.280223873031834 |
| POLQ    | 0.386151399887776  |
| POP7    | 0.294402829862165  |
| POPDC3  | -0.451993383451342 |
| PPFIA3  | 0.360667357848455  |
| PPFIBP1 | -0.26918965336027  |
| PPID    | 0.279249104061936  |
| PPL     | -0.317077469613974 |
| PPM1A   | -0.217184076773184 |
| PPP4C   | 0.26819191778341   |
| PPRC1   | 0.291014367543528  |
| PREP    | -0.240312736519653 |
| PRKAA2  | -0.574751871754205 |
| PROCR   | 0.325459285298083  |
| PRPF19  | 0.179281349547704  |

|           |                    |
|-----------|--------------------|
| PRR5      | 0.327981751380068  |
| PRSS16    | -0.316772938988223 |
| PRSS35    | 0.267765211640351  |
| PSAT1     | 0.303901760921688  |
| PSMB6     | 0.281232948646175  |
| PSMC5     | 0.232187055793464  |
| PSMG1     | 0.337660711273998  |
| PTDSS1    | 0.263607453441468  |
| PTP4A1    | 0.201174585514735  |
| PTPN12    | -0.273681946702202 |
| PTPN14    | -0.403956986663434 |
| PUS7      | 0.260780185789483  |
| PWP2      | 0.336146733876765  |
| QARS      | 0.223885996749286  |
| QRSL1     | 0.334621454854203  |
| RAB27B    | -0.417309739825663 |
| RAB3B     | -0.335601597757381 |
| RAC3      | 0.268712817636024  |
| RAE1      | 0.26247830620703   |
| RAMP1     | -0.391513359807817 |
| RASSF8    | -0.553933979513699 |
| RBM14     | 0.44536991985371   |
| RBM47     | -0.33398289342423  |
| RBMS2     | -0.283613107021913 |
| RC3H2     | -0.218032595562031 |
| RCC1      | 0.287153252664589  |
| REEP3     | -0.349635805443165 |
| RELN      | -0.302202532713878 |
| RICTOR    | -0.224013238297109 |
| RND2      | -0.361794300708613 |
| RNF13     | -0.304611972296038 |
| RNF167    | 0.283206028449559  |
| RNF182    | -0.657491258126472 |
| RNF213    | -0.308332263304271 |
| RNPEP     | 0.209746471168291  |
| RPARP-AS1 | 0.325601304277711  |



|           |                    |
|-----------|--------------------|
| RPL13A    | 0.386063774809793  |
| RPL27A    | 0.248826115768166  |
| RPL9      | 0.360539921915688  |
| RPP30     | 0.237512462206552  |
| RPS19BP1  | 0.424828172195585  |
| RPS6KA2   | -0.383821269738466 |
| RPS6KA5   | -0.314875746423047 |
| RRAGD     | -0.261997356324536 |
| RRP1      | 0.329450249700764  |
| RRP12     | 0.314844280283981  |
| RRP1B     | 0.25511579954798   |
| RRP9      | 0.401130031445279  |
| RUNX1     | -0.580282778084246 |
| RUVBL1    | 0.288044800071737  |
| SAMD9L    | -0.331724533937747 |
| SASH3     | 0.249030434269955  |
| SATB1     | -0.350063384526789 |
| SCD       | 0.355190776559467  |
| SCRIB     | 0.467860916406638  |
| SDC1      | 0.377113389735982  |
| SDCCAG3   | 0.35725258624545   |
| SDHA      | 0.257571578706592  |
| SECISBP2L | -0.288684127348336 |
| SEL1L3    | -0.253922750112148 |
| SELL      | -0.331219332211215 |
| SERINC1   | -0.243848342656149 |
| SERPINA1  | -0.5559593884637   |
| SERPINA5  | -0.476778867446564 |
| SERPINE1  | -0.363552735119493 |
| SF3A3     | 0.300925546493629  |
| SFN       | 0.334581251797111  |
| SGCE      | -0.380656854934592 |
| SGPL1     | -0.221417559405489 |
| SH2D2A    | 0.288126668682774  |
| SH3D19    | -0.321801941697024 |
| SHMT2     | 0.380422084272497  |

|          |                    |
|----------|--------------------|
| SIX4     | -0.290215347365848 |
| SKIL     | -0.347937052880552 |
| SLC15A1  | -0.419678066743427 |
| SLC19A1  | 0.298587217396187  |
| SLC24A1  | -0.353583760714324 |
| SLC25A1  | 0.267037320355928  |
| SLC25A19 | 0.308489435224784  |
| SLC30A4  | -0.324085854854446 |
| SLC3A2   | 0.346074409133857  |
| SLC43A3  | 0.338886774738131  |
| SLC4A3   | -0.343575882921843 |
| SLC6A20  | -0.521052528916274 |
| SLC7A11  | 0.321367825924676  |
| SLC7A5   | 0.340127226013937  |
| SLC7A6   | 0.304158832477069  |
| SLIT2    | -0.337814820062281 |
| SMURF2   | -0.424561637563587 |
| SNAPC3   | -0.278183159356428 |
| SNHG17   | 0.328366467683876  |
| SNHG9    | 0.339574923138002  |
| SNORA64  | 0.481570242943669  |
| SNORD17  | 0.271960771115842  |
| SNORD79  | 0.359281438630796  |
| SNTB1    | -0.372973199137791 |
| SNTG2    | 0.21092051256907   |
| SNX10    | -0.252032608666847 |
| SNX17    | 0.219515876497741  |
| SNX7     | -0.321843518826816 |
| SORBS1   | -0.353462415705385 |
| SORL1    | -0.396919215412829 |
| SOX9     | -0.499879831592265 |
| SPARCL1  | -0.301825207741492 |
| SPATS2L  | -0.313056488875132 |
| SPCS1    | 0.244991372393141  |
| SPOP     | 0.328768597288217  |
| SPR      | 0.306918350475942  |

|         |                    |
|---------|--------------------|
| SPRY2   | -0.360121114412707 |
| SPTY2D1 | -0.263800415608412 |
| SQLE    | 0.334577511535661  |
| SQRDL   | -0.33393367022109  |
| SREBF2  | 0.238638699209089  |
| SRGAP2D | -0.329977816046465 |
| SSB     | 0.28141685480925   |
| SSBP3   | -0.319646640434142 |
| SSBP4   | 0.30239357273681   |
| ST7     | 0.326234958648098  |
| STAM2   | -0.220777384419931 |
| STAT2   | -0.325614303467127 |
| STAU2   | -0.259975534000642 |
| STEAP1  | -0.341424468747398 |
| STEAP2  | -0.41140798917408  |
| STOML2  | 0.256925232546333  |
| STOX1   | -0.395266039108159 |
| STRA6   | -0.293172780457539 |
| STX7    | -0.240633721797379 |
| SUCO    | -0.267699239531446 |
| SUSD1   | -0.314271613837494 |
| SUSD2   | -0.389782885128046 |
| SYK     | 0.282254767478712  |
| SYNE1   | -0.478854481759793 |
| SYNE2   | -0.495646284875021 |
| TACC3   | 0.246037145063016  |
| TAF13   | 0.346261445106549  |
| TALDO1  | 0.229690905016136  |
| TANC2   | -0.249517068409132 |
| TBC1D8  | -0.269162942565729 |
| TCEB3   | 0.230189311691411  |
| TCF7L2  | -0.282479201814942 |
| TCP11L2 | -0.319619899138034 |
| TELO2   | 0.372911504042109  |
| TES     | 0.180446950416861  |
| TFAP2A  | -0.445305761368306 |

|          |                    |
|----------|--------------------|
| TFPI     | -0.305859555677713 |
| TFRC     | 0.469131274264773  |
| TGFB3    | -0.371417204590629 |
| THOP1    | 0.277517879720849  |
| TIAM1    | -0.2744903197865   |
| TM4SF1   | -0.574928054443921 |
| TM4SF18  | -0.353509985259659 |
| TMC6     | -0.271726465841084 |
| TMCC1    | 0.298034300894719  |
| TMEM2    | -0.335352193356816 |
| TMEM200A | -0.387202783361154 |
| TMEM263  | -0.27656970570446  |
| TMEM38A  | 0.32967335116552   |
| TMEM55A  | -0.361833298626093 |
| TMOD2    | -0.337614799037351 |
| TMTC2    | -0.306345689051845 |
| TNIK     | -0.523880709426942 |
| TNS3     | -0.354245929393023 |
| TOMM5    | 0.260492034554395  |
| TOMM6    | 0.363552173863407  |
| TONSL    | 0.391397535483555  |
| TOP3A    | 0.256471195324791  |
| TOR1AIP2 | -0.196193116962297 |
| TOR4A    | 0.307991813863366  |
| TOX2     | -0.322385370606648 |
| TPBG     | 0.338713218345054  |
| TRAM2    | -0.225477868763186 |
| TRHDE    | -0.419301371482818 |
| TRIM16   | 0.59865727771033   |
| TRIM28   | 0.186689915812786  |
| TRIM36   | -0.268455881728742 |
| TRIQK    | -0.452146147352487 |
| TRMT1    | 0.423895847922005  |
| TRMT112  | 0.372412801929455  |
| TSC22D1  | -0.296108915273091 |
| TSPAN1   | -0.36864126274666  |

|        |                    |
|--------|--------------------|
| TSPO   | 0.302198435513778  |
| TTC19  | -0.246044264484168 |
| TTC27  | 0.28002847071331   |
| TTN    | 0.361389984679462  |
| TUBA1C | 0.261548093297966  |
| TUFM   | 0.209639976490586  |
| TUSC2  | 0.388808908729019  |
| TXNL4A | 0.33394062355965   |
| TXNRD1 | 0.329898236905909  |
| TYMS   | 0.312965488440574  |
| U2AF2  | 0.258313403944875  |
| UBE2H  | 0.262769025563709  |
| UBE2J2 | 0.328913599932     |
| UBE3D  | 0.452250096988549  |
| UCK2   | 0.320611682750777  |
| UFD1L  | 0.264825912271094  |
| UFSP1  | 0.265884534495606  |
| UNC13A | 0.469528515176014  |
| UTP20  | 0.207878833783141  |
| UTRN   | -0.437928555962431 |
| VDAC3  | 0.256782565371995  |
| VEZF1  | -0.249551061885629 |
| VPS13C | -0.334717973466898 |
| VPS41  | -0.23372315575253  |
| WASL   | -0.280141887091514 |
| WDR3   | 0.253591543440992  |
| WDR5   | 0.31659693666664   |
| WDR72  | -0.366616400081529 |
| WDR74  | 0.246748330057817  |
| WDTC1  | -0.381121119623827 |
| WIPI1  | -0.31293994532032  |
| WNK2   | 0.426666454804625  |
| WSB2   | 0.249411093352256  |
| WWC1   | 0.370552983805355  |
| WVOX   | -0.322933054781479 |
| WWTR1  | -0.412475785735384 |

|         |                    |
|---------|--------------------|
| XPO5    | 0.227635082906978  |
| XPO6    | 0.177039938163668  |
| XPOT    | 0.219775502941338  |
| XRN1    | -0.294979498960137 |
| YAP1    | -0.258521120206483 |
| YARS    | 0.347096007659935  |
| YLPM1   | 0.251234971614823  |
| YRDC    | 0.313683090056556  |
| ZBTB20  | -0.27328614353465  |
| ZBTB38  | -0.334719563549286 |
| ZBTB41  | -0.213757320439169 |
| ZC2HC1A | -0.30688363891717  |
| ZC3H6   | -0.255623171629546 |
| ZDHHC20 | -0.24300485442678  |
| ZFHX4   | -0.239286279349265 |
| ZFP36L2 | 0.323402958974224  |
| ZFR     | 0.197642089930925  |
| ZNF169  | 0.327044685602788  |
| ZNF33A  | -0.278230750150349 |
| ZNF33B  | -0.340997349478186 |
| ZNF367  | 0.352955493467617  |
| ZNF615  | 0.365330498984959  |
| ZNF648  | -0.381665818376451 |
| ZNF771  | 0.353360239862355  |
| ZNF789  | 0.320180879649692  |
| ZNF792  | -0.374877853711027 |
| ZNF860  | -0.398538496354151 |

Supplementary Table 9. Dysregulated genes in HCT116 SMC1A c.A2027G induced tumours.\*

| Gene    | LogFoldChange      |
|---------|--------------------|
| ABCA4   | 0.400592101215397  |
| ABCF2   | -0.27841955309202  |
| ABHD17A | 0.466321612439955  |
| ACADVL  | 0.438436754913556  |
| ACBD4   | 0.397086560735457  |
| ACSF2   | 0.480881045257957  |
| ADCY6   | 0.554730732657733  |
| ADCY7   | 0.34714222458328   |
| ADPRHL2 | 0.427368188953336  |
| AES     | -0.460134389036358 |
| AHCTF1  | -0.310003262382099 |
| AHI1    | -0.438588380277164 |
| AIM1L   | 0.608499945581246  |
| AK6     | -0.462744751310323 |
| AKAP9   | -0.336653623066578 |
| AKT1S1  | -0.381601323353291 |
| ALCAM   | -0.435367199922471 |
| ALOX5   | 0.465532951773224  |
| AMZ2    | -0.275676907589951 |
| ANKFY1  | 0.290557180398765  |
| ANKRD17 | -0.248268179328874 |
| ANKRD22 | 0.40686122022985   |
| ANKRD9  | 0.437321209966669  |
| ANKS3   | 0.400865756359018  |
| ANLN    | -0.420698712876537 |
| ANO1    | -0.660576984827703 |
| ANO9    | 0.436595772010045  |
| ANP32B  | -0.384822903802176 |
| AP3B1   | -0.348181149664281 |
| AP5Z1   | 0.411969388700963  |
| APH1A   | 0.30517584640646   |
| APOL6   | 0.520401029488569  |
| ARFGAP1 | 0.368756764257786  |

|           |                    |
|-----------|--------------------|
| ARHGAP11A | -0.337818335352339 |
| ARHGAP29  | 0.384852240690438  |
| ARHGDI A  | -0.495276897075561 |
| ARHGEF10L | 0.526213468559583  |
| ARHGEF17  | 0.416614288623763  |
| ARHGEF18  | 0.324309508714368  |
| ARHGEF37  | 0.530652232350986  |
| ARL14EPL  | -0.762084288988482 |
| ARL2      | -0.589681533076057 |
| ARL4A     | 0.745010107494648  |
| ARRDC4    | 0.444915556028485  |
| ASAP1-IT1 | 0.368015734084773  |
| ASB1      | 0.520015605959372  |
| ASPM      | -0.453079756795645 |
| ASXL2     | -0.410169555625694 |
| ATAD2     | -0.401689376016788 |
| ATF5      | -0.535733403509956 |
| ATG3      | -0.377447565067769 |
| ATG4B     | 0.383046353318648  |
| ATP10B    | 0.300940729104923  |
| ATP5J2    | -0.735954567652196 |
| ATP6V0E2  | -0.456792967752984 |
| ATRN      | 0.566971588987728  |
| ATRX      | -0.271325710686215 |
| ATXN2L    | -0.472396345742283 |
| AURKA     | -0.542518849509988 |
| B4GALNT4  | 0.435976879691729  |
| BAG4      | -0.287750354605995 |
| BAI2      | 0.684983663754836  |
| BAZ1B     | -0.428096430604387 |
| BCL3      | -0.446942797798269 |
| BCLAF1    | -0.275887250356998 |
| BLCAP     | 0.411622319618209  |
| BLVRB     | 0.387880780443725  |
| BMP7      | -0.399460686637606 |
| BNIP2     | -0.280961697713949 |



|          |                    |
|----------|--------------------|
| BOD1L1   | -0.321828721723967 |
| BRCA2    | -0.346181739651106 |
| BRD4     | -0.453379063448434 |
| BRIX1    | -0.334811727325722 |
| BTF3     | -0.464121759871648 |
| BUB1B    | -0.277505663709353 |
| C11orf1  | -0.455655407977388 |
| C11orf83 | 0.588562555033604  |
| C12orf76 | 0.450575969906971  |
| C17orf97 | -0.430810934477197 |
| C18orf21 | -0.353850802269503 |
| C19orf43 | -0.440525409405687 |
| C1orf210 | 0.429113299051649  |
| C22orf23 | 0.304604470400147  |
| C7orf63  | -0.452701140824932 |
| C9orf69  | 0.420233230052502  |
| C9orf89  | 0.535330409553077  |
| CA12     | 0.455823466232615  |
| CACNA1B  | 0.431077793590575  |
| CALD1    | -0.266898138421109 |
| CALM2    | -0.422352667097245 |
| CANT1    | 0.287530357861594  |
| CASC5    | -0.43485470867642  |
| CATSPER2 | 0.301275550111244  |
| CBWD5    | 0.488488467495326  |
| CCDC110  | -0.541356018245856 |
| CCDC136  | 0.432022052205154  |
| CCDC142  | 0.522109183076901  |
| CCDC18   | -0.435222816331576 |
| CCDC34   | -0.411215050215408 |
| CCDC88A  | -0.411446293094268 |
| CCNA2    | -0.426049411477204 |
| CCNB1    | -0.358405173720479 |
| CCNK     | -0.301470946541208 |
| CCNL2    | 0.458271034015741  |
| CCR1     | 0.232315087799115  |

|          |                    |
|----------|--------------------|
| CD81     | 0.270400171008454  |
| CDC20    | -0.317173728877022 |
| CDC27    | -0.397030225273344 |
| CDC42BPG | 0.334792152706721  |
| CDC42EP1 | -0.585223656732898 |
| CDC42SE1 | 0.361819946739746  |
| CDC73    | -0.302684152015824 |
| CDCA8    | -0.365165979925011 |
| CDK10    | 0.427753354967309  |
| CDS2     | 0.400483799139984  |
| CELSR1   | 0.36039849760049   |
| CENPE    | -0.686696757498597 |
| CENPF    | -0.512899942145811 |
| CEP290   | -0.408759409490187 |
| CEP70    | -0.445031435640694 |
| CEP83    | -0.348913903969911 |
| CEP89    | -0.438297894131131 |
| CFL1     | -0.53375453929266  |
| CHML     | -0.316087868375717 |
| CIZ1     | -0.395111743910098 |
| CKAP2    | -0.565421887439058 |
| CKAP2L   | -0.401191833655378 |
| CKAP5    | -0.426042465781282 |
| CKLF     | -0.419599284520201 |
| CLIP1    | -0.306056158792055 |
| CLPX     | -0.369870000029251 |
| CLSPN    | -0.317342674857771 |
| CLSTN3   | 0.499882598998047  |
| CNDP2    | 0.318009915176205  |
| CNIH1    | -0.259191972911471 |
| CNN2     | -0.341137314222195 |
| CNOT1    | -0.288088362478616 |
| COL4A5   | 0.480472483083879  |
| COPS2    | -0.393755054300085 |
| COX5A    | -0.339295363743453 |
| CPSF3    | -0.287178854167598 |

|          |                    |
|----------|--------------------|
| CPVL     | 0.497225123557187  |
| CREBBP   | -0.322483555838808 |
| CRLS1    | 0.374675743087039  |
| CRTC2    | -0.399187821309316 |
| CRYL1    | 0.389069370052022  |
| CSPP1    | -0.321598635407746 |
| CST6     | 0.473650228735522  |
| CTNNAL1  | -0.32407824138975  |
| CUL2     | -0.319321847713225 |
| CUL5     | -0.297453671379727 |
| CYB5A    | 0.422439103631204  |
| CYTH1    | 0.459743240713511  |
| DAPK3    | 0.391552853160994  |
| DCP1A    | -0.289144857439998 |
| DDOST    | 0.254552468434909  |
| DDX46    | -0.28636849492876  |
| DEF8     | 0.349182750271111  |
| DEK      | -0.557289485625697 |
| DEPDC1   | -0.32855030166484  |
| DFFB     | 0.544399203074556  |
| DHRS7    | 0.324251207866305  |
| DIAPH2   | -0.385022008781051 |
| DIAPH3   | -0.451910787534047 |
| DLAT     | -0.276601004447642 |
| DLGAP5   | -0.480084433432068 |
| DNAH2    | 0.418244451732089  |
| DNAJC2   | -0.427016019110963 |
| DNAJC7   | -0.327442843300729 |
| DNMT1    | -0.383839689152199 |
| DTL      | -0.28486161556883  |
| DYNC1LI1 | -0.30607373825598  |
| EAPP     | -0.341671751823468 |
| ECT2     | -0.431655422748784 |
| EEF1A1   | -0.650721524562345 |
| EEF1D    | -0.443391276504668 |
| EFNA3    | -0.431333806988828 |

|              |                    |
|--------------|--------------------|
| EGR2         | -0.505715010044182 |
| EHF          | 0.592006368487107  |
| EIF1         | -0.343944827755148 |
| EIF2A        | -0.299320209284698 |
| EIF3E        | -0.326541832783698 |
| EIF3J        | -0.471042112911027 |
| EIF3J-AS1    | 0.489960707567304  |
| EIF4G2       | -0.343520176014504 |
| EIF4G3       | -0.280172474260256 |
| EIF5B        | -0.419549782010073 |
| ELMO3        | 0.404557048272354  |
| ENAH         | -0.251621032114413 |
| ENDOV        | 0.44775779157414   |
| ENSA         | -0.398460963502978 |
| EPB41L4A-AS1 | 0.412780592910666  |
| ERC1         | -0.244657124838244 |
| ERCC6L       | -0.351730911650621 |
| ERCC6L2      | -0.249351617449819 |
| ERF          | -0.571909888655751 |
| ERMARD       | 0.433495605212496  |
| EXTL3        | 0.30251157126476   |
| EZH2         | -0.296209362978077 |
| FAM131A      | 0.428909683296446  |
| FAM131C      | -0.457865484682834 |
| FAM198B      | 0.451796177758052  |
| FAM210A      | -0.402582334198828 |
| FAM222B      | -0.371427366569954 |
| FAM46C       | 0.489892915078606  |
| FARSB        | -0.320250770433813 |
| FBN3         | 0.574151846024106  |
| FBXL6        | 0.649830426093248  |
| FBXO5        | -0.348497551499769 |
| FER1L4       | 0.432005620788883  |
| FGFRL1       | -0.440159029962579 |
| FGR          | 0.228661303241169  |
| FKBP1A       | -0.476181702832406 |

|          |                    |
|----------|--------------------|
| FKRP     | 0.478562531892004  |
| FMNL3    | -0.385913587681362 |
| FN3K     | 0.428179243113226  |
| FOSL1    | -0.722157275314571 |
| FOXMI    | -0.448003037176379 |
| FOXP4    | -0.469863820836718 |
| FXYD5    | -0.397155823843482 |
| GALK1    | 0.411873915969392  |
| GAS2L3   | -0.458734722370132 |
| GATAD2B  | -0.333897143607053 |
| GCC2     | -0.386722694506651 |
| GDPD3    | 0.369479866139655  |
| GJC1     | -0.293279563339077 |
| GLIS2    | -0.387648640470041 |
| GLUD1    | -0.331168353914773 |
| GLUD1P3  | 0.455660055971842  |
| GNE      | -0.391682339648885 |
| GNG5     | -0.352298528149856 |
| GNS      | 0.27187694109709   |
| GOLIM4   | -0.4673373988081   |
| GPATCH8  | -0.300448123915629 |
| GPR85    | -0.637394714335659 |
| GPR87    | 0.563499891144437  |
| GPS2     | -0.400107251644864 |
| GPT2     | 0.404534956356711  |
| GRIN2B   | 0.496900950527305  |
| GSN      | 0.434415839369764  |
| GTF3A    | -0.312941895149043 |
| GTPBP2   | 0.434055675774426  |
| GUK1     | 0.380161084239288  |
| HBB      | -0.646568183513455 |
| HCFC1R1  | -0.60662562435138  |
| HDAC2    | -0.405308484812558 |
| HELZ2    | 0.495702585624556  |
| HIRA     | 0.378591498682525  |
| HIST1H1E | -0.496395647086012 |

|           |                    |
|-----------|--------------------|
| HIST1H2AJ | -0.411777747988852 |
| HIST1H2BC | -0.497771461040435 |
| HIST1H2BJ | -0.511731884964978 |
| HIST1H2BK | -0.451997803936849 |
| HIST1H2BO | -0.398315254282452 |
| HIST1H3B  | -0.416330567283081 |
| HIST1H4E  | -0.48049448279916  |
| HIST2H2BE | -0.547077586779466 |
| HIST2H2BF | -0.522018131963881 |
| HJURP     | -0.425443308349252 |
| HMGA1     | -0.407103257154261 |
| HMGNS     | -0.500686136662268 |
| HMMR      | -0.511815889099578 |
| HNRNPC    | -0.284041546860118 |
| HNRNPUL1  | -0.344925337971185 |
| HOOK2     | 0.408047467469847  |
| HOXA9     | 0.535323245718376  |
| HOXB4     | -0.442304183039474 |
| HOXC9     | -0.445296741813769 |
| HSP90AA1  | -0.570723073570974 |
| HSPD1     | -0.407281899363456 |
| HUWE1     | -0.318795450872057 |
| IAH1      | 0.425453423055271  |
| IBA57     | 0.527575800466288  |
| IDE       | -0.347262123260848 |
| IER5      | 0.467577195735709  |
| IGF2      | -0.56940421007238  |
| IL18      | -0.557452881866994 |
| IL4R      | 0.525733258689171  |
| INCENP    | -0.297859814203664 |
| IPO7      | -0.253720040366289 |
| ITPKC     | 0.538911737915527  |
| JADE1     | -0.459769880738891 |
| JAG1      | 0.38768730652108   |
| KBTBD11   | 0.338007611972242  |
| KHSRP     | -0.48378643025521  |

|              |                    |
|--------------|--------------------|
| KIAA0513     | 0.576426594430299  |
| KIAA1430     | -0.310103267566416 |
| KIAA1524     | -0.45401682959656  |
| KIAA1551     | -0.399362202819175 |
| KIF11        | -0.387028018247463 |
| KIF14        | -0.450594918705433 |
| KIF15        | -0.464405925697508 |
| KIF18B       | -0.438696515225161 |
| KIF20B       | -0.424983124415166 |
| KIF23        | -0.448781296400841 |
| KIF4A        | -0.426897277583648 |
| KIF5B        | -0.390571256695031 |
| KIFAP3       | -0.385949772491634 |
| KLF2         | -0.429108463791522 |
| KLHL29       | 0.416839271466406  |
| KTN1         | -0.375673263266003 |
| LAMB2        | 0.384296247428394  |
| LENG1        | -0.439113266723241 |
| LEO1         | -0.33138020964014  |
| LHFP         | 0.340784096541479  |
| LIN54        | -0.332010791540861 |
| LMTK3        | -0.582904140472594 |
| LNX1         | 0.471851216244092  |
| LOC100129940 | 0.327211307731664  |
| LOC100294362 | 0.450691594142501  |
| LOC100506639 | 0.413789822244756  |
| LOC729603    | 0.400758074599106  |
| LRPPRC       | -0.293235763571274 |
| LRRC24       | 0.432528995836582  |
| LRRC4        | 0.291747567600359  |
| LYAR         | -0.403112395578949 |
| MAGED2       | 0.352019911329269  |
| MAMDC2       | 0.455831191772148  |
| MAP4         | -0.399420869774726 |
| MAP7D3       | -0.497621336881016 |
| MARCH2       | 0.497838052665334  |

|           |                    |
|-----------|--------------------|
| MAT2A     | 0.390529418254092  |
| MBNL1     | -0.308266995311116 |
| MESDC1    | 0.392016948217664  |
| METAP2    | -0.313385247031822 |
| MGC57346  | 0.367420966769382  |
| MIDN      | -0.372680519636543 |
| MIRLET7A1 | -0.27078936243161  |
| MIS18BP1  | -0.510474884262151 |
| MKI67     | -0.746442145601877 |
| MND1      | -0.53967526500009  |
| MNS1      | -0.441025778488804 |
| MOB1A     | -0.290573385976552 |
| MON1B     | 0.381303629141665  |
| MPHOSPH10 | -0.427394170448864 |
| MRPL14    | 0.379058444111132  |
| MUC16     | -0.673019159421924 |
| MYBL1     | -0.522322903442785 |
| MYEOV2    | -0.382907501261218 |
| MYL6      | 0.286007529219519  |
| NAA15     | -0.284925018219422 |
| NAA20     | 0.455648951855004  |
| NACA2     | -0.361132339322295 |
| NAF1      | -0.313466931525455 |
| NAP1L1    | -0.397082976647118 |
| NAPB      | 0.491901462577423  |
| NAPRT1    | 0.521303863812991  |
| NBPF1     | 0.443119644658794  |
| NCAPG     | -0.364335631429959 |
| NCAPH     | -0.450844402482461 |
| NCL       | -0.504947541292949 |
| NCOA6     | -0.29557118898387  |
| NDUFA12   | -0.434832377203934 |
| NDUFAF5   | 0.473384906351344  |
| NECAP2    | 0.44426338186956   |
| NEK1      | -0.302825819407015 |
| NEK5      | 0.4317464786642    |



|              |                    |
|--------------|--------------------|
| NEMF         | -0.319627225122138 |
| NFIC         | -0.581779022478663 |
| NIN          | -0.252964071586836 |
| NIPBL        | -0.314451849994404 |
| NKRF         | -0.321106981477948 |
| NME2         | 0.390088548573834  |
| NOL7         | -0.345746154901305 |
| NOL8         | -0.284820256383112 |
| NOLC1        | -0.33357927019218  |
| NPHP3-ACAD11 | 0.314637490101937  |
| NSFL1C       | -0.317716054118973 |
| NTRK2        | 0.29201505468139   |
| NUDT22       | 0.417200682209591  |
| NUDT3        | -0.656434595390825 |
| NUF2         | -0.39104995045142  |
| NUP153       | -0.277153669114639 |
| OAS2         | 0.419166644597332  |
| OASL         | 0.441160681504732  |
| OCLN         | 0.370911603374748  |
| OGFOD3       | 0.451567967059753  |
| OGFRL1       | -0.410850499421936 |
| OLA1         | -0.378185181138914 |
| ORMDL3       | 0.417455435156287  |
| OTUD5        | -0.527039447269328 |
| PABPC1       | -0.563918718676143 |
| PABPC1L      | 0.46016553725137   |
| PABPC1P2     | -0.341124787142598 |
| PARPBP       | -0.430044322303456 |
| PAWR         | -0.340496971201139 |
| PCDHB9       | 0.392291946713244  |
| PCED1A       | 0.555340148763027  |
| PCF11        | -0.356911051650464 |
| PCM1         | -0.255177671753118 |
| PDCD5        | -0.392943142825545 |
| PDF          | 0.488143032673022  |
| PDS5A        | -0.258121194618847 |

|            |                    |
|------------|--------------------|
| PELP1      | -0.356414194003634 |
| PFDN4      | -0.483108211443989 |
| PFN1       | -0.732975544777461 |
| PHC3       | -0.235374158195469 |
| PHIP       | -0.370584474594911 |
| PIAS1      | -0.297842916222969 |
| PIBF1      | -0.560066458730872 |
| PIK3AP1    | 0.38907298980863   |
| PIP4K2A    | -0.48935877472394  |
| PITPNA-AS1 | -0.416301261970958 |
| PKD1       | 0.396495429682182  |
| PKIB       | 0.513500448890105  |
| PKP3       | 0.293603922358151  |
| PLA2G15    | 0.480534548095628  |
| PLA2G16    | 0.43161869739069   |
| PLEKHG1    | 0.335841304753553  |
| PLEKHO2    | 0.504639283523286  |
| PLK1       | -0.376212840556635 |
| PMF1       | -0.559022515131364 |
| PMP22      | -0.382078265195539 |
| POLA1      | -0.373718666668344 |
| POMZP3     | -0.519226784956395 |
| PON2       | 0.354423930731305  |
| PPAPDC1B   | 0.469889104069623  |
| PPIC       | 0.505228076945847  |
| PPIG       | -0.450032605657474 |
| PPP1R12A   | -0.305095455959534 |
| PPP1R15A   | 0.434062454588562  |
| PPP1R3B    | 0.290004268553669  |
| PPP3CA     | -0.300817668338682 |
| PRC1       | -0.396551934460668 |
| PRC1-AS1   | 0.278047642180813  |
| PRKAA1     | -0.301948282573971 |
| PRKACA     | -0.458527381873152 |
| PRKCH      | 0.383698441094298  |
| PRKDC      | -0.404437159970673 |

|          |                    |
|----------|--------------------|
| PROM2    | 0.505848433056827  |
| PRPF40A  | -0.302788632222988 |
| PRPF8    | -0.291065582870919 |
| PRR11    | -0.535605269778802 |
| PRRC2C   | -0.436813336212401 |
| PRSS3    | 0.411877124052163  |
| PSIP1    | -0.539573797400791 |
| PSMD1    | -0.305689022371644 |
| PSMD6    | -0.307570258458874 |
| PTGES3   | -0.289637495332961 |
| PTMS     | -0.508998247533719 |
| PUS1     | 0.393847704112917  |
| PVRL4    | 0.571708972373793  |
| PVT1     | -0.431221942486525 |
| QSER1    | -0.282886826979526 |
| QSOX1    | 0.310126024680333  |
| R3HDM1   | -0.279323877806886 |
| R3HDM2   | -0.37371235555492  |
| RAB25    | -0.385431681090629 |
| RABAC1   | 0.484489452055932  |
| RAD18    | -0.468644556358022 |
| RAD21    | -0.283132726469625 |
| RAD50    | -0.337546737061657 |
| RAI14    | -0.293887032466855 |
| RALGAPA2 | 0.461699086147509  |
| RASSF2   | 0.511943561044065  |
| RASSF7   | 0.436533626415359  |
| RAVER1   | -0.373795536375669 |
| RB1      | -0.33191894146881  |
| RBBP6    | -0.320522027909834 |
| RBM25    | -0.410027929899303 |
| RBM26    | -0.341470105958788 |
| RBMXL1   | -0.400689942769738 |
| RCAN2    | 0.5215014134892    |
| RGS2     | -0.402401574713202 |
| RIF1     | -0.296415159300606 |

|            |                    |
|------------|--------------------|
| RIPK4      | 0.45886138659255   |
| RNA5-8S5   | -0.267220145303479 |
| RNF141     | 0.367217737565073  |
| RNF219-AS1 | 0.274796146161212  |
| RNF24      | 0.420538019959028  |
| RNMTL1     | 0.382819581045015  |
| RNY5       | -0.293554306414785 |
| RPAP3      | -0.365656737041315 |
| RPL26      | -0.460939054845248 |
| RPL29      | -0.64603402093402  |
| RPL30      | -0.377245312521628 |
| RPL32      | -0.456476978578674 |
| RPL35      | -0.364622256077179 |
| RPL37      | -0.429370991291514 |
| RPL39      | -0.579448052707007 |
| RPL4       | -0.448128633360536 |
| RPL41      | -0.431012308667265 |
| RPL6       | -0.644036246263894 |
| RPS15A     | -0.4201925950298   |
| RPS24      | -0.347266496473355 |
| RPS25      | -0.476280389322799 |
| RPS26      | -0.422075705146259 |
| RPS27A     | 0.39800803134978   |
| RPS4X      | -0.404086862716403 |
| RPS9       | 0.360483860514492  |
| RSAD2      | 0.795015998962265  |
| RSF1       | -0.468021317545739 |
| RSL1D1     | -0.387282801266688 |
| RSL24D1    | -0.307350079345054 |
| RSRC2      | -0.367045701452233 |
| RTN3       | -0.302152703025506 |
| RTN4       | -0.293339968801683 |
| RUNX3      | -0.430582415836125 |
| S100A2     | -0.505381938731971 |
| S100A4     | -0.481189544028263 |
| S100A6     | -0.607541893351658 |

|          |                    |
|----------|--------------------|
| SAR1A    | 0.260580393301399  |
| SASS6    | -0.46916963209558  |
| SCAND1   | 0.460158021691315  |
| SCARNA11 | -0.386315371879617 |
| SCARNA9  | -0.50433703559419  |
| SCARNA9L | -0.418316126392798 |
| SCLT1    | -0.41303422287227  |
| SCYL3    | 0.450960804776446  |
| SDAD1    | -0.300230469604794 |
| SDR42E1  | 0.386914440849196  |
| SEC23B   | 0.339912927341773  |
| SELO     | 0.405146355017674  |
| SEMA3B   | 0.442394695154729  |
| SEMA3D   | 0.413524321937729  |
| SENP6    | -0.281424258500433 |
| SEPP1    | 0.464385815740201  |
| SEPT10   | -0.244057079044151 |
| SEPT5    | -0.354058350613448 |
| SERBP1   | -0.28181146230323  |
| SETD1A   | -0.409965331860565 |
| SF3A1    | -0.346722319924777 |
| SF3A2    | -0.463204643950997 |
| SF3B1    | -0.239035193044971 |
| SF3B4    | -0.401295664967023 |
| SGOL2    | -0.556530870274975 |
| SH2D4A   | -0.382544515333813 |
| SH3BP5   | 0.311725353836101  |
| SIK2     | -0.308452179279213 |
| SKA3     | -0.537351857701794 |
| SKIV2L2  | -0.265051771531753 |
| SLC15A4  | 0.375639953599511  |
| SLC1A1   | 0.419502331612537  |
| SLC25A23 | -0.414169906561047 |
| SLC25A29 | 0.467260805201676  |
| SLC35B1  | 0.402969855091522  |
| SLC35E2  | 0.445788415276851  |

|           |                    |
|-----------|--------------------|
| SLC38A10  | 0.35761350339088   |
| SLTM      | -0.254976625765913 |
| SMARCC1   | -0.484704157738034 |
| SMC2      | -0.394577362436096 |
| SMC3      | -0.400444854535999 |
| SMC4      | -0.548738506861798 |
| SMC6      | -0.425727826866647 |
| SMIM14    | 0.51460365728411   |
| SMNDC1    | -0.321270985623694 |
| SMO       | 0.383872402899704  |
| SNHG15    | 0.445500378188059  |
| SNORA70   | -0.423427755989491 |
| SNORA71C  | -0.459204417060777 |
| SNORA76C  | 0.488258528062619  |
| SNORA7B   | -0.440517859682704 |
| SNORA80B  | -0.436153101284686 |
| SNORA84   | -0.397313547747333 |
| SNORD100  | -0.50574862617327  |
| SNORD104  | -0.535486471805568 |
| SNORD105  | -0.590405728891798 |
| SNORD105B | -0.695913975125125 |
| SNORD11   | -0.629028286739052 |
| SNORD119  | -0.791837330127134 |
| SNORD12   | -0.567465358262408 |
| SNORD12B  | -0.602703506428129 |
| SNORD1C   | -0.623218094805933 |
| SNORD21   | -0.434968580475173 |
| SNORD24   | -0.658750634019142 |
| SNORD27   | -0.533049184351469 |
| SNORD28   | -0.428281917535574 |
| SNORD30   | -0.642566759785902 |
| SNORD31   | -0.666752889448958 |
| SNORD36A  | -0.675015288444612 |
| SNORD36B  | -0.44648655084991  |
| SNORD36C  | -0.515665400751476 |
| SNORD37   | -0.427706122782574 |

|           |                    |
|-----------|--------------------|
| SNORD41   | -0.695845520467241 |
| SNORD42B  | -0.494877346948506 |
| SNORD44   | -0.728873414007869 |
| SNORD45A  | -0.697429416697169 |
| SNORD45C  | -0.517184406532887 |
| SNORD47   | -0.649183231947748 |
| SNORD54   | -0.539060524467468 |
| SNORD56   | -0.706915303175169 |
| SNORD57   | -0.435420795556438 |
| SNORD58A  | -0.410388977859028 |
| SNORD58C  | -0.761530758019399 |
| SNORD59B  | -0.411879481657347 |
| SNORD60   | -0.449390875503887 |
| SNORD61   | -0.704952923685336 |
| SNORD63   | -0.472097186380742 |
| SNORD65   | -0.516440618729453 |
| SNORD66   | -0.519979106372791 |
| SNORD69   | -0.654698674656874 |
| SNORD70   | -0.563305673515902 |
| SNORD76   | -0.474288255212209 |
| SNORD78   | -0.50548577883421  |
| SNORD80   | -0.530986581951545 |
| SNORD81   | -0.496375819048478 |
| SNORD87   | -0.709828679240083 |
| SNORD88A  | -0.492294656247368 |
| SNORD91A  | -0.384166633530441 |
| SNORD91B  | -0.495089346599663 |
| SNORD92   | -0.482962340457219 |
| SNRPA     | -0.372125980456507 |
| SNRPE     | 0.436736143633325  |
| SNW1      | -0.346473146601228 |
| SORBS3    | -0.514635309131399 |
| SP2       | -0.460959622402585 |
| SP6       | 0.42393777272357   |
| SPAG5-AS1 | 0.267466179002138  |
| SPDL1     | -0.412740702668143 |

|         |                    |
|---------|--------------------|
| SPINT2  | 0.338466677574938  |
| SPPL2B  | 0.433342056553924  |
| SPTB    | 0.493209243291898  |
| SRPK1   | -0.4060583349953   |
| SRRM1   | -0.378713307936089 |
| SRSF5   | 0.427628095880655  |
| SSRP1   | -0.472993429005747 |
| ST13    | -0.444011442460024 |
| ST14    | 0.379056174990382  |
| ST3GAL3 | -0.434096860274256 |
| STAG1   | -0.332624273296877 |
| STAU1   | -0.270101419802013 |
| STIL    | -0.370395428547316 |
| STMN1   | -0.392855469565996 |
| STX16   | 0.440143045229362  |
| STYXL1  | -0.419620261240496 |
| SUMF1   | 0.546168864290902  |
| SUMO2   | -0.542805604504468 |
| SUPT6H  | -0.280985155071849 |
| SWAP70  | -0.313095610350958 |
| SYNCRIP | -0.259692206908298 |
| SYNJ2   | 0.438811441365119  |
| TACC2   | -0.411122567043842 |
| TAF3    | -0.356195719474448 |
| TAF4    | -0.367277626737069 |
| TAX1BP3 | 0.389873813688345  |
| TBC1D16 | 0.448349861935676  |
| TCF7L1  | -0.511534041139219 |
| TCP1    | -0.327926237347428 |
| TDRD3   | -0.53530710130795  |
| TFAP4   | -0.430879307262994 |
| TGFB2   | -0.538784706124319 |
| THBD    | 0.312490544632494  |
| THBS1   | -0.615154526476278 |
| THBS3   | 0.535568398591169  |
| THEMIS2 | 0.433496257671605  |



|          |                    |
|----------|--------------------|
| THOC7    | -0.432481077182471 |
| TIAL1    | -0.320804882115106 |
| TIMM9    | -0.556724235297019 |
| TLK1     | -0.369522055484659 |
| TM9SF1   | 0.343610908724865  |
| TMED9    | 0.53669177103186   |
| TMEM120B | 0.475280958030546  |
| TMEM123  | -0.291568062211601 |
| TMEM131  | -0.342024873450406 |
| TMEM139  | 0.427801378458936  |
| TMEM179B | 0.358936266207947  |
| TMEM44   | 0.565440824572907  |
| TMEM8A   | 0.484667520267198  |
| TMEM98   | 0.513164485362764  |
| TOB1     | -0.419910108492419 |
| TOP1     | -0.405583365735689 |
| TOP2A    | -0.48255571794485  |
| TP53I11  | -0.429783810462506 |
| TPM2     | -0.411805744428881 |
| TPM3     | -0.430254062841265 |
| TPR      | -0.350999911478261 |
| TPT1     | -0.652600748702457 |
| TPX2     | -0.468372162992017 |
| TRAPPC5  | 0.527656016104029  |
| TSPAN10  | -0.345491987970029 |
| TSPAN13  | 0.48316551064215   |
| TSPAN14  | 0.389140474270346  |
| TSPAN31  | 0.417689945719787  |
| TTC1     | -0.337547582929519 |
| TTK      | -0.383584934112134 |
| TUBA1B   | -0.29852016764763  |
| TUBB     | -0.450008559909975 |
| TUBB4A   | -0.515318227908403 |
| TXNL1    | -0.433460941058712 |
| U2SURP   | -0.260632823614054 |
| UACA     | -0.453907666329128 |

|           |                      |
|-----------|----------------------|
| UBAC2-AS1 | 0.441500644147032    |
| UBALD1    | -0.500843221595638   |
| UBE2V2    | -0.341731755019479   |
| UBQLN1    | -0.317826228059099   |
| UBQLN2    | -0.338677913133651   |
| UBR3      | -0.246350052036992   |
| UCHL5     | -0.302754020452681   |
| UNC119B   | 0.603227592546756    |
| USP10     | -0.272507070037546   |
| UTS2B     | -0.509191099128417   |
| VPS18     | 0.346845529585422    |
| VRK1      | -0.345762992492345   |
| VTCN1     | 0.712181959041402    |
| VTRNA1-2  | 0.31958086589279     |
| VTRNA1-3  | 0.442771733692266    |
| WAC       | -0.255570876308219   |
| WAPAL     | -0.361487200840092   |
| WBP11     | -0.368007416783856   |
| WBP2      | -0.405529254259837   |
| WDR4      | 0.627530792007874    |
| WDR66     | 0.513849226045594    |
| WNT10B    | 0.414485886979339    |
| XPO1      | -0.329530629984126   |
| YBX1      | -0.37720156630221    |
| YWHAE     | -0.428674256632632   |
| YWHAEP1   | -0.34378152542273    |
| YWHAQ     | -0.243524871916403   |
| ZBED2     | -100.725.121.096.312 |
| ZBTB34    | 0.417315572024076    |
| ZBTB4     | -0.376738495567529   |
| ZBTB7A    | -0.522535384600072   |
| ZC3H13    | -0.46616663356783    |
| ZC3H15    | -0.317742314442393   |
| ZCCHC10   | -0.396868483869739   |
| ZFP30     | -0.457187750222499   |
| ZIC2      | 0.404054277740159    |

|         |                    |
|---------|--------------------|
| ZMIZ2   | -0.368348694211105 |
| ZNF133  | 0.548925914059015  |
| ZNF207  | -0.258156286342458 |
| ZNF263  | 0.340959484210055  |
| ZNF276  | 0.440107052383951  |
| ZNF385A | -0.612808400660952 |
| ZNF385B | -0.437289577396025 |
| ZNF423  | 0.449853472661985  |
| ZNF432  | 0.386457689821558  |
| ZNF579  | -0.492568711927218 |
| ZNF580  | -0.47461841096824  |
| ZNF589  | 0.466249841313642  |
| ZNF608  | 0.370621731092185  |
| ZNF624  | -0.427394405209512 |
| ZNF644  | -0.401904895896494 |
| ZNF696  | 0.426660632690652  |
| ZNF704  | 0.474261061538553  |
| ZNF707  | 0.508094221898776  |
| ZNF776  | 0.437661444222065  |
| ZNF783  | 0.453913830896684  |
| ZNF800  | -0.436172932690704 |
| ZNF804A | 0.430877525221433  |
| ZNF808  | 0.385849241217813  |
| ZNRF3   | 0.432017936894937  |
| ZSCAN32 | 0.389408111920594  |

\*Genes were listed with the exception of the 68 common genes reported in Figure 3c.
