# Supplementary material for: Overexpression of the cohesin-core subunit SMC1A contributes to colorectal cancer development
Source: PubMed Central journal article supplement (PMC6397456; doi:10.1186/s13046-019-1116-0), 2019-03-01
Supplement: 13046_2019_1116_MOESM13_ESM.pdf [file 13046_2019_1116_MOESM13_ESM.pdf]

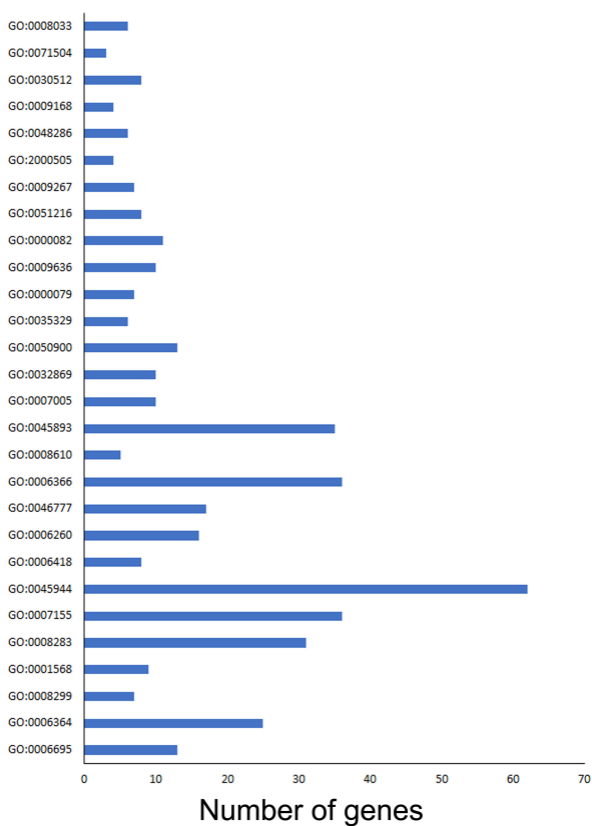

Supplementary Figure 13

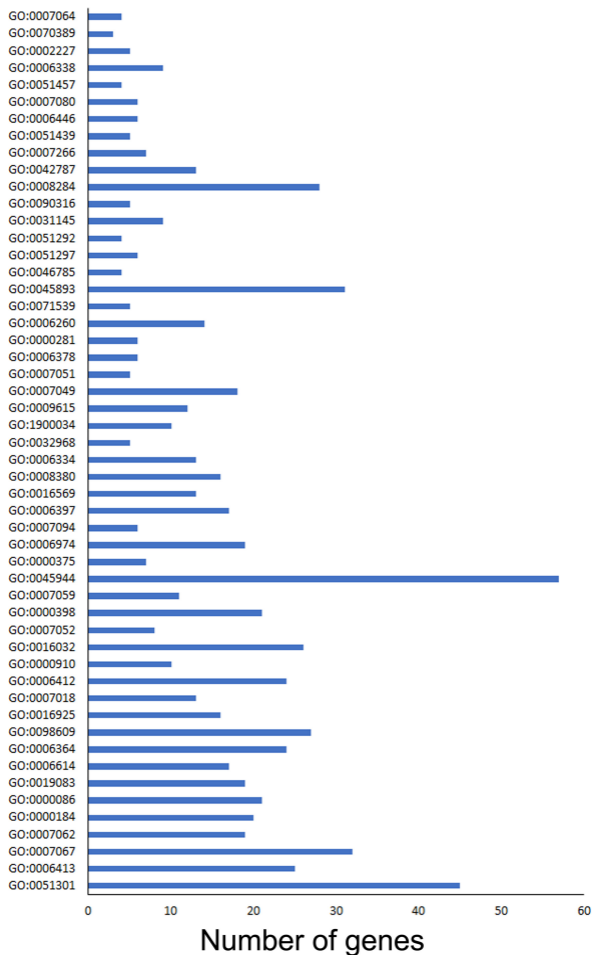

Supplementary Figure 14

Supplementary Table 10. Dysregulated pathways identified in tumors induced by *SMC1A* wild-type with  $p < 0.01$ .

| <b>Pathway Description</b>                                                                   | <b>P-value</b> |
|----------------------------------------------------------------------------------------------|----------------|
| GO:0006695~cholesterol biosynthetic process                                                  | 1,50E-08       |
| GO:0006364~rRNA processing                                                                   | 5,00E-06       |
| GO:0008299~isoprenoid biosynthetic process                                                   | 9,00E-06       |
| GO:0001568~blood vessel development                                                          | 1,00E-04       |
| GO:0008283~cell proliferation                                                                | 1,60E-04       |
| GO:0007155~cell adhesion                                                                     | 2,00E-04       |
| GO:0045944~positive regulation of transcription from RNA polymerase II promoter              | 3,70E-04       |
| GO:0006418~tRNA aminoacylation for protein translation                                       | 9,20E-04       |
| GO:0006260~DNA replication                                                                   | 1,40E-03       |
| GO:0046777~protein autophosphorylation                                                       | 1,50E-03       |
| GO:0006366~transcription from RNA polymerase II promoter                                     | 1,50E-03       |
| GO:0008610~lipid biosynthetic process                                                        | 1,80E-03       |
| GO:0045893~positive regulation of transcription DNA-templated                                | 2,90E-03       |
| GO:0007005~mitochondrion organization                                                        | 3,50E-03       |
| GO:0032869~cellular response to insulin stimulus                                             | 3,50E-03       |
| GO:0050900~leukocyte migration                                                               | 3,50E-03       |
| GO:0035329~hippo signaling                                                                   | 3,90E-03       |
| GO:0000079~regulation of cyclin-dependent protein serine/threonine kinase activity           | 4,20E-03       |
| GO:0009636~response to toxic substance                                                       | 6,70E-03       |
| GO:0000082~G1/S transition of mitotic cell cycle                                             | 7,50E-03       |
| GO:0051216~cartilage development                                                             | 8,80E-03       |
| GO:0009267~cellular response to starvation                                                   | 1,10E-02       |
| GO:2000505~regulation of energy homeostasis                                                  | 1,10E-02       |
| GO:0048286~lung alveolus development                                                         | 1,10E-02       |
| GO:0009168~purine ribonucleoside monophosphate biosynthetic process                          | 1,30E-02       |
| GO:0030512~negative regulation of transforming growth factor beta receptor signaling pathway | 1,40E-02       |
| GO:0071504~cellular response to heparin                                                      | 1,50E-02       |
| GO:0008033~tRNA processing                                                                   | 1,50E-02       |

Supplementary Table 11. Dysregulated pathways identified in tumors induced by *SMC1A* c.A2027G with  $p < 0.01$ .

| <b>Pathway Description</b>                                                                 | <b>P-value</b> |
|--------------------------------------------------------------------------------------------|----------------|
| GO:0051301~cell division                                                                   | 1,30E-13       |
| GO:0006413~translational initiation                                                        | 5,40E-11       |
| GO:0007067~mitotic nuclear division                                                        | 6,60E-10       |
| GO:0007062~sister chromatid cohesion                                                       | 1,50E-08       |
| GO:0000184~nuclear-transcribed mRNA catabolic process nonsense-mediated decay              | 2,70E-08       |
| GO:0000086~G2/M transition of mitotic cell cycle                                           | 5,50E-08       |
| GO:0019083~viral transcription                                                             | 5,60E-08       |
| GO:0006614~SRP-dependent cotranslational protein targeting to membrane                     | 1,40E-07       |
| GO:0006364~rRNA processing                                                                 | 1,60E-06       |
| GO:0098609~cell-cell adhesion                                                              | 3,00E-06       |
| GO:0016925~protein sumoylation                                                             | 1,30E-05       |
| GO:0007018~microtubule-based movement                                                      | 2,20E-05       |
| GO:0006412~translation                                                                     | 2,60E-05       |
| GO:0000910~cytokinesis                                                                     | 3,40E-05       |
| GO:0016032~viral process                                                                   | 4,80E-05       |
| GO:0007052~mitotic spindle organization                                                    | 6,00E-05       |
| GO:0000398~mRNA splicing via spliceosome                                                   | 9,80E-05       |
| GO:0007059~chromosome segregation                                                          | 1,10E-04       |
| GO:0045944~positive regulation of transcription from RNA polymerase II promoter            | 1,70E-04       |
| GO:0000375~RNA splicing via transesterification reactions                                  | 1,70E-04       |
| GO:0006974~cellular response to DNA damage stimulus                                        | 3,50E-04       |
| GO:0007094~mitotic spindle assembly checkpoint                                             | 5,00E-04       |
| GO:0006397~mRNA processing                                                                 | 5,20E-04       |
| GO:0016569~covalent chromatin modification                                                 | 5,60E-04       |
| GO:0008380~RNA splicing                                                                    | 6,80E-04       |
| GO:0006334~nucleosome assembly                                                             | 8,80E-04       |
| GO:0032968~positive regulation of transcription elongation from RNA polymerase II promoter | 1,10E-03       |
| GO:1900034~regulation of cellular response to heat                                         | 1,10E-03       |
| GO:0009615~response to virus                                                               | 1,50E-03       |
| GO:0007049~cell cycle                                                                      | 1,50E-03       |
| GO:0007051~spindle organization                                                            | 1,90E-03       |
| GO:0006378~mRNA polyadenylation                                                            | 2,50E-03       |
| GO:0000281~mitotic cytokinesis                                                             | 2,90E-03       |
| GO:0006260~DNA replication                                                                 | 3,00E-03       |
| GO:0071539~protein localization to centrosome                                              | 3,00E-03       |
| GO:0045893~positive regulation of transcription DNA-templated                              | 4,10E-03       |
| GO:0046785~microtubule polymerization                                                      | 4,20E-03       |
| GO:0051297~centrosome organization                                                         | 4,80E-03       |

|                                                                                             |          |
|---------------------------------------------------------------------------------------------|----------|
| GO:0051292~nuclear pore complex assembly                                                    | 5,30E-03 |
| GO:0031145~anaphase-promoting complex-dependent catabolic process                           | 6,00E-03 |
| GO:0090316~positive regulation of intracellular protein transport                           | 6,40E-03 |
| GO:0008284~positive regulation of cell proliferation                                        | 6,70E-03 |
| GO:0042787~protein ubiquitination involved in ubiquitin-dependent protein catabolic process | 7,10E-03 |
| GO:0007266~Rho protein signal transduction                                                  | 7,40E-03 |
| GO:0051439~regulation of ubiquitin-protein ligase activity involved in mitotic cell cycle   | 7,50E-03 |
| GO:0006446~regulation of translational initiation                                           | 7,70E-03 |
| GO:0007080~mitotic metaphase plate congression                                              | 8,60E-03 |
| GO:0051457~maintenance of protein location in nucleus                                       | 9,20E-03 |
| GO:0006338~chromatin remodeling                                                             | 9,90E-03 |
| GO:0002227~innate immune response in mucosa                                                 | 1,00E-02 |
| GO:0070389~chaperone cofactor-dependent protein refolding                                   | 1,10E-02 |
| GO:0007064~mitotic sister chromatid cohesion                                                | 1,10E-02 |
